# Supplementary material for: Ammonium-adduct chemical ionization to investigate anthropogenic oxygenated gas-phase organic compounds in urban air
Source: Copernicus journal article supplement (doi:10.5194/acp-2022-421), 2022-06-14
Supplement: Supplementary file 1 [file acp-2022-421-supplement.pdf]

## **Supplemental Information**

### **Ammonium-adduct chemical ionization to investigate anthropogenic oxygenated gas-phase organic compounds in urban air**

Peeyush Khare<sup>1,¶</sup>, Jordan E. Krechmer<sup>2</sup>, Jo Ellen Machesky<sup>1</sup>, Tori Hass-Mitchell<sup>1</sup>, Cong Cao<sup>3</sup>, Junqi Wang<sup>1</sup>, Francesca Majluf<sup>2,\*\*</sup>, Felipe Lopez-Hilfiker<sup>4</sup>, Sonja Malek<sup>1</sup>, Will Wang<sup>1</sup>, Karl Seltzer<sup>5</sup>, Havala O.T. Pye<sup>6</sup>, Roisin Commane<sup>7</sup>, Brian C. McDonald<sup>8</sup>, Ricardo Toledo-Crow<sup>9</sup>, John E. Mak<sup>3</sup>, Drew R. Gentner<sup>1,10</sup>

<sup>1</sup>Department of Chemical and Environmental Engineering, Yale University, New Haven CT-06511 USA

<sup>2</sup>Aerodyne Research Inc. Billerica MA- 02181 USA

<sup>3</sup>School of Marine and Atmospheric Science, Stony Brook University, Stony Brook NY-11794 USA

<sup>4</sup>Tofwerk AG, CH-3600 Thun, Switzerland

<sup>5</sup>Office of Air and Radiation, Environmental Protection Agency, Research Triangle Park, NC-27711 USA

<sup>6</sup>Office of Research and Development, Environmental Protection Agency, Research Triangle Park, NC-27711 USA

<sup>7</sup>Department of Earth and Atmospheric Sciences, Columbia University, New York, NY-10027 USA

<sup>8</sup>Chemical Sciences Laboratory, National Oceanic and Atmospheric Administration, Boulder CO- USA

<sup>9</sup>Advanced Science Research Center, City University of New York, New York, NY-10031 USA

<sup>10</sup>School of the Environment, Yale University, New Haven CT-06511 USA

<sup>¶</sup>now at: Laboratory of Atmospheric Chemistry, Paul Scherrer Institute, Villigen AG-5232 Switzerland

<sup>\*\*</sup> now at: Franklin W. Olin College of Engineering (fmajluf@olin.edu, (781) 292-2300).

---

## Table of Contents

### Figures

- Fig. S1** Aerial visualization of the sampling location at the ASRC (City University of New York).  
**Fig. S2** Regional map showing radial distances of 10, 20 and 30 kilometers from the sampling site.  
**Fig. S3** Stability of ammonium-parent ion adducts as a function of voltage and IMR temperatures.  
**Fig. S4** Average ambient mass spectra collected using Vocus CI-ToF with  $\text{NH}_4^+$  as the reagent ion.  
**Fig. S5** Sensitivity analysis for CI-ToF response factors as a function of isomer.  
**Fig. S6** Comparison between measured concentrations of select analytes by the  $\text{NH}_4^+$ -ToF and PTR-ToF instruments over the sampling period.  
**Fig. S7** Wind speed and direction at the sampling site during the measurement period.  
**Fig. S8** Potential chemical losses of different chemical species due to OH oxidation.  
**Fig. S9** Geometric mean ion abundances of all measured ions averaged over the duration of the sampling campaign.  
**Fig. S10** Geometric mean of absolute concentrations averaged over the entire duration of the sampling campaign.  
**Fig. S11** Linear regression slopes vs geometric mean concentration ratios with  $\text{C}_3\text{H}_6\text{O}$ .  
**Fig. S12** Image plot of concentration-based linear correlation coefficients.  
**Fig. S13** Image plot of ion abundance-based linear correlation coefficients.  
**Fig. S14** List of measured ion formulas sorted by ions with the highest counts of concentration-based correlation coefficients exceeding 0.9.  
**Fig. S15** The complete list of measured ion formulas sorted by ions with the highest counts of ion abundance-based correlation coefficients exceeding 0.9.  
**Fig. S16** Concentration ratios versus annual emissions inventories (compared to acetone) labelled as likely isomers.  
**Fig. S17** Comparison of correlation coefficients against select tracer compounds using ion abundances of all target species.  
**Fig. S18** Examples of observed strong linear correlations between  $\text{C}_7\text{H}_8\text{O}$  and select other species.

### Tables

- Table S1** Chemical composition of the analytical standard cylinder used for mass calibration of select species.  
**Table S2** Mass response factors of select measured ions.  
**Table S3** Geometric mean ion abundances measured for all calibrated and non-calibrated ions.  
**Table S4** List of the calibrated ion formulas measured, their possible chemical isomers and examples of uses.  
**Table S5** List of calibrated ions and their enhancement ratios with tracer compounds with uncertainties over the sampling period.
-

## S1. Detailed description of correlations observed between trends in measured ions

To supplement the discussion in the main text and accompany correlation-related figures S9-12, here we use both concentration and ion abundance-based linear regressions to compare correlations between oxygenated species that potentially have similar or co-located sources. Only ions with the strongest correlations ranging from 0.85 to 1 were considered here to reduce the effect of meteorological influences on linear regressions. Compounds are also identified whose dynamics in the atmosphere could be important from an emissions or air quality perspective and warrant further investigation in future studies. Given that a wide range of possible uses exist for many of these compounds, mentions of specific sources are not intended to exclude other potential contributing source types, but rather to identify co-varying compounds (and shared uses) where potentially useful to the reader.

### *Glycols and glycol ethers*

$C_2H_6O_2$ , a prominent ion in this study identified primarily as ethylene glycol, showed very good correlations ( $r > 0.9$ ) with 19 other ions, and was most strongly correlated ( $r > 0.95$ ) with  $C_3H_9NO$  (e.g. aminopropanol). Most of these were volatile  $C_xH_yO$  ions with carbon numbers  $\leq 6$  including  $C_3H_6O$  (e.g. acetone),  $C_4H_6O$  (e.g. MVK),  $C_6H_{10}O$  (e.g. cyclohexanone) and  $C_5H_8O$  (e.g. cyclopentanone), but also  $C_{10}H_{12}O$  (e.g. benzyl acetone) and among others. The remaining ones were largely ester-containing  $C_xH_yO_2$  ions. These compounds are widely used as solvents, with some also likely constituents of personal care products. This suggested that solvents could be an important contributor of  $C_2H_6O_2$  in ambient environments.

Glycol ether-related ions generally did not show very strong correlations with other ions. With the exception of  $C_8H_{18}O_2$  (e.g. EGHE) and  $C_8H_{18}O_3$  (e.g. dipropylene glycol butyl ether or DGBE), almost all ions in this category were correlated with  $r \leq 0.9$ . EGHE is used in many consumer and commercial products while DGBE is a popular solvent. The strongest correlations ( $r > 0.95$ ) of  $C_8H_{18}O_2$  were with ions representing menthol, linalool and benzyl acetate, which was consistent with the popular use of EGHE in fragrance-related products. EGHE also showed good correlations ( $r > 0.9$ ) with 29 other ions that were mainly constituted by  $C_xH_yO$  and  $C_xH_yO_4$  ion groups such as  $C_7H_8O$ ,  $C_{11}H_{20}O$ ,  $C_{14}H_{22}O$ ,  $C_{16}H_{30}O_4$ ,  $C_{10}H_{22}O_4$  and  $C_9H_{18}O_4$ . In the case of DGBE, no ions showed  $r > 0.95$  but 17 ions were well-correlated ( $r > 0.9$ ). The highest of these were ions containing EGHE, benzyl alcohol and some oxy-terpenoids such as menthol and linalool.

$C_6H_{12}O_3$  likely included propylene glycol methyl ether acetate (PGMEA) and 2-ethoxyethyl acetate that are widely used in coatings, printing inks and cleaning products. However, only 3 other ions correlated well ( $r > 0.9$ ) with  $C_6H_{12}O_3$ . These included  $C_7H_{14}O_3$  (e.g. ethyl-3-ethoxypropionate),  $C_8H_{16}O_3$  (e.g. butoxyethyl acetate) and  $C_6H_{12}O$  (e.g. methyl butyl ketone)

while another 33 ions showed an  $r > 0.85$ . The highest among these remaining ones were  $C_xH_yO$  ions containing acetone, MVK and benzyl acetone.

#### *Select personal care product-related compounds*

Personal care products also likely contributed to glycol ether-related ion measurements. For example,  $C_8H_{10}O_2$  (e.g. phenoxyethanol) was well-correlated ( $r > 0.9$ ) with  $C_7H_8O$ ,  $C_{10}H_{12}O$ ,  $C_{10}H_{18}O$  and  $C_{10}H_{20}O$  ions, which represent benzyl alcohol, benzyl acetone, menthol and linalool. This was consistent with two major contributing isomers to  $C_8H_{10}O_2$  being phenoxyethanol and 1,4 dimethoxybenzene that are used in personal care products. The isomer contributions were further substantiated by  $C_8H_{10}O_2$  concentration peaks that coincided with morning and evening commute hours. Among other species in this category,  $C_{10}H_{22}O_4$  (e.g. triethylene glycol butyl ether or TEGBE) most strongly correlated with  $C_{14}H_{22}O$  (e.g.  $\alpha$ -isomethyl ionone) ( $r > 0.95$ ) that is primarily used in perfumes and other cosmetic products. Other major correlations included ions containing EGHE and benzyl acetate ( $r > 0.9$ ).

#### *Carbonyls*

Ions representing carbonyls also showed good correlations with a wide range of ions.  $C_3H_6O$  (e.g. acetone) exhibited strong correlations ( $r > 0.95$ ) with  $C_3H_9NO$  (e.g. aminopropanol),  $C_6H_{10}O$  (e.g. cyclohexanone) and  $C_8H_{14}O$  (6-methyl-5-hepten-2-one). However, it was also well-correlated ( $r > 0.9$ ) with 30 more ions that were dominated by  $C_xH_yO$  compounds with  $C_{\#}$ 's ranging from 4 to 12 such as MVK, MEK, cyclopentanone, and benzyl acetone. In addition,  $C_xH_yO_2$  ions related to cyclohexyl acetate, ethyl acetoacetate, ethylene glycol and butyl acrylate were also well-correlated with acetone.  $C_6H_{10}O$  (e.g. cyclohexanone) correlated strongly with  $C_4H_6O_2$ ,  $C_5H_8O$  and  $C_8H_{14}O_2$  ions consistent with the popular use of cyclohexanone as a general solvent.  $C_6H_{10}O$  also correlated well with  $C_8H_{16}O$ ,  $C_{10}H_{12}O$  and  $C_6H_{10}O_2$  ions that are related to personal care products.

$C_4H_8O$  (e.g. MEK) exhibited particularly strong correlations ( $r > 0.95$ ) with ions prevalent in oxygenated solvents suggesting connections to solvent-related sources. There likely were smaller contributions from personal care products as evidenced by good correlations with  $C_3H_9NO$ ,  $C_6H_{10}O$ ,  $C_6H_{12}O$  and  $C_8H_{14}O$ . Other carbonyl-related ions (e.g.  $C_6H_{12}O$ ) were mainly strongly correlated with compounds used in fragrances and cosmetic products.  $C_7H_6O$  (e.g. benzaldehyde) showed strongest correlation with  $C_8H_8O$  (e.g. acetophenone) which is used in solvents and fragrances but also found in automobile exhaust. It also varied strongly with  $C_6H_{12}O$ ,  $C_8H_{16}O$ ,  $C_{10}H_{12}O$  and  $C_9H_{10}O_2$  that suggest solvents and cosmetics to be major sources. Overall, this supports large contributions of solvent-related sources to carbonyl-related ions.

Some variability was observed in the number of species with which the oxy-terpenoid-related ions were strongly correlated, suggestive of multiple sources types. For example,  $C_{10}H_{20}O$  (e.g. menthol) showed good correlations ( $r > 0.9$ ) with 41 ions. Of these, 14 ions were strongly

correlated ( $r > 0.95$ ) and included glycol ethers, carbonyls, esters and alcohols.  $C_{10}H_{18}O$  correlated nearly perfectly with  $C_{10}H_{20}O$ . On the other hand,  $C_{10}H_{16}O$  (e.g. camphor) was well-correlated ( $r > 0.9$ ) with only four ions that included other major oxy-terpenoid-related ions, i.e.  $C_{10}H_{20}O$  (e.g. menthol),  $C_{10}H_{18}O$  (e.g. linalool),  $C_9H_{12}O_2$  (e.g. phenoxy propanol) and  $C_{12}H_{20}O_2$  (e.g. geranyl acetate). Correlations with  $C_{10}H_{30}O_5Si_5$  (e.g. D5 siloxane) were also around 0.9. Most of these compounds (except D5) can be found in cleaning products, which likely contributed to  $C_{10}H_{18}O$  ion signal since it strongly varied with the same ions but also with  $C_{11}H_{22}O_2$  and  $C_{19}H_{18}O_2$  (e.g. FAMES) and  $C_{10}H_{20}O_2$  (e.g. hydroxycitronellal).

On the contrary, no ions correlated very strongly ( $r > 0.95$ ) with D5 siloxane but 13 ions showed  $r > 0.9$ . Menthol- and linalool-containing ions showed the best correlations with D5 ( $r \sim 0.93$ ) followed by several  $C_xH_yO_2$  ions such as  $C_{12}H_{20}O_2$  (e.g.  $\alpha$ -terpinyl acetate) and  $C_9H_{10}O_2$  (e.g. benzyl acetate), which are used in cosmetics and other fragrance-related products.  $C_7H_8O$  (e.g. benzyl alcohol) concentrations varied very similarly to several ions containing oxy-terpenoids, monoterpenes, D5 siloxane and acetates that are found in cosmetic products.

Fragrances and related solvents likely also contributed to  $C_7H_{14}O_2$  (e.g. amyl acetate) since it showed very strong correlations with  $C_4H_6O_2$ ,  $C_8H_{14}O_2$ ,  $C_7H_8O$ ,  $C_8H_{16}O$  and  $C_{10}H_{20}O$  ions. The highest correlations ( $r > 0.96$ ) were observed with  $C_8H_{16}O$  (e.g. octanal) and  $C_7H_8O$  (e.g. benzyl alcohol) suggesting that fragrance-based products were likely important contributors of  $C_7H_{14}O_2$ . Similarly,  $C_8H_{16}O_2$  (e.g. caprylic acid) also exhibited similar variations as fragrance-related esters and solvents, and correlated strongly with  $C_7H_{14}O_2$  suggesting possible similar sources.

$C_{12}H_{24}O_2$  (e.g. lauric acid) was reasonably correlated ( $r \sim 0.9$ ) with  $C_8H_{14}O_2$ ,  $C_{10}H_{18}O_2$ ,  $C_8H_{16}O_4$  and  $C_8H_{16}O$  that are prominently used in fragrances. Among other semivolatile ions,  $C_{18}H_{34}O_2$  (e.g. oleic acid), did not show appreciable correlation with other ions potentially due to variations in emissions pathways, sources and gas-to-particle partitioning effects.

### *Nitrogen-containing species*

Among the nitrogen-containing ions measured,  $C_2H_7NO$  (e.g. monoethanolamine) correlated strongly with  $C_{10}H_{30}O_5Si_5$  (e.g. D5) except the period when it was influenced by biomass burning.  $C_2H_7NO$  also correlated very strongly ( $r > 0.9$ ) with  $C_4H_8O_2$  (e.g. ethyl acetate) and with some solvents. Unlike  $C_2H_7NO$ ,  $C_4H_{11}NO_2$  (e.g. diethanolamine) did not show appreciable correlation with tracers of personal care products such as D5 siloxane. This could be due to diethanolamine being primarily used as feedstock for the production of diethanolamides and diethanolamine salts of fatty acids that are used in cosmetic products. Triethanolamine showed very weak correlations ( $r < 0.85$ ) with majority of the measured ions. Its timeseries varied somewhat similarly with only some aldehyde- and ester-containing ions that are prevalent in fragrance-related products (e.g. phenoxyethyl isobutyrate, pentanal). This suggested that triethanolamine is also likely emitted

from personal care products where it sees common usage, though with potential partitioning limitations.

#### *Fatty acid methyl esters*

FAME-containing ions strongly correlated with each other suggesting overlap in their sources in urban environments.  $C_9H_{18}O_2$  (e.g. methyl octanoate) also correlated strongly with ions containing menthol, octanal, benzyl acetone, hydroxycitronellal and esters that are prevalent in personal care products. Some correlation was also observed with ions containing carbonyl solvents that are used in both consumer and other commercial products suggesting multiple source contributions to  $C_9H_{18}O_2$ . The same ions formed the best set of correlations for  $C_{11}H_{22}O_2$  (e.g. methyl decanoate).

#### *Texanol and TXIB*

$C_{12}H_{24}O_3$  (e.g. texanol) which is a tracer for water-based paints.  $C_{16}H_{30}O_4$  represents TXIB that is found in a variety of architectural products (Gkatzelis et al., 2021). They did not correlate significantly with each other given some variations in their use. In fact,  $C_{12}H_{24}O_3$  correlated considerably ( $r > 0.85$ ) only with the  $C_8H_{18}O_2$  ion related to EGHE which is also found in water-based coatings among other wider uses. On the other hand,  $C_{16}H_{30}O_4$  showed good correlation with a wider range of compounds and the concentrations of  $C_{16}H_{30}O_4$  also exceeded  $C_{12}H_{24}O_3$  throughout the measurement period. The strongest similarities in its timeseries were observed with ions containing glycol ethers prevalent in paint-related products, but aromatic esters (e.g.  $C_9H_{10}O_2$ ; benzyl acetate) and some oxy-terpenoids-related ions (e.g.  $C_{10}H_{20}O$ ; menthol,  $C_{10}H_{18}O$ ; linalool) showed good correlation with  $C_{16}H_{30}O_4$ .

$C_3H_8O_3$  (e.g. glycerol) showed particularly strong correlation with  $C_3H_6O_2$  that is related to methyl acetate, propanoic acid and/or ethyl formate.  $C_8H_8O_3$  (e.g. methyl paraben) varied similarly as  $C_9H_{12}O_2$  (e.g. phenoxy propanol),  $C_5H_6O_2$  (e.g. furfuryl alcohol) and  $C_7H_8O$  (e.g. benzyl alcohol) that are used in personal care products (except furfuryl alcohol). It also correlated with oxy-terpenoids found in fragrance-related products.

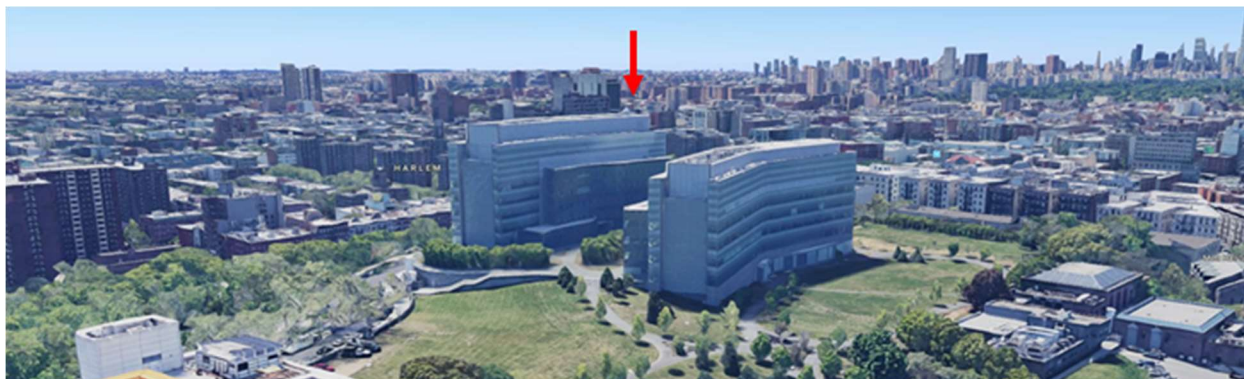

**Figure S1.** Aerial visualization (© Google Maps) of the sampling location at the ASRC (City University of New York), with view from NNW. The instrument inlet pointed toward downtown Manhattan shown in the distance in the top-right of the image.

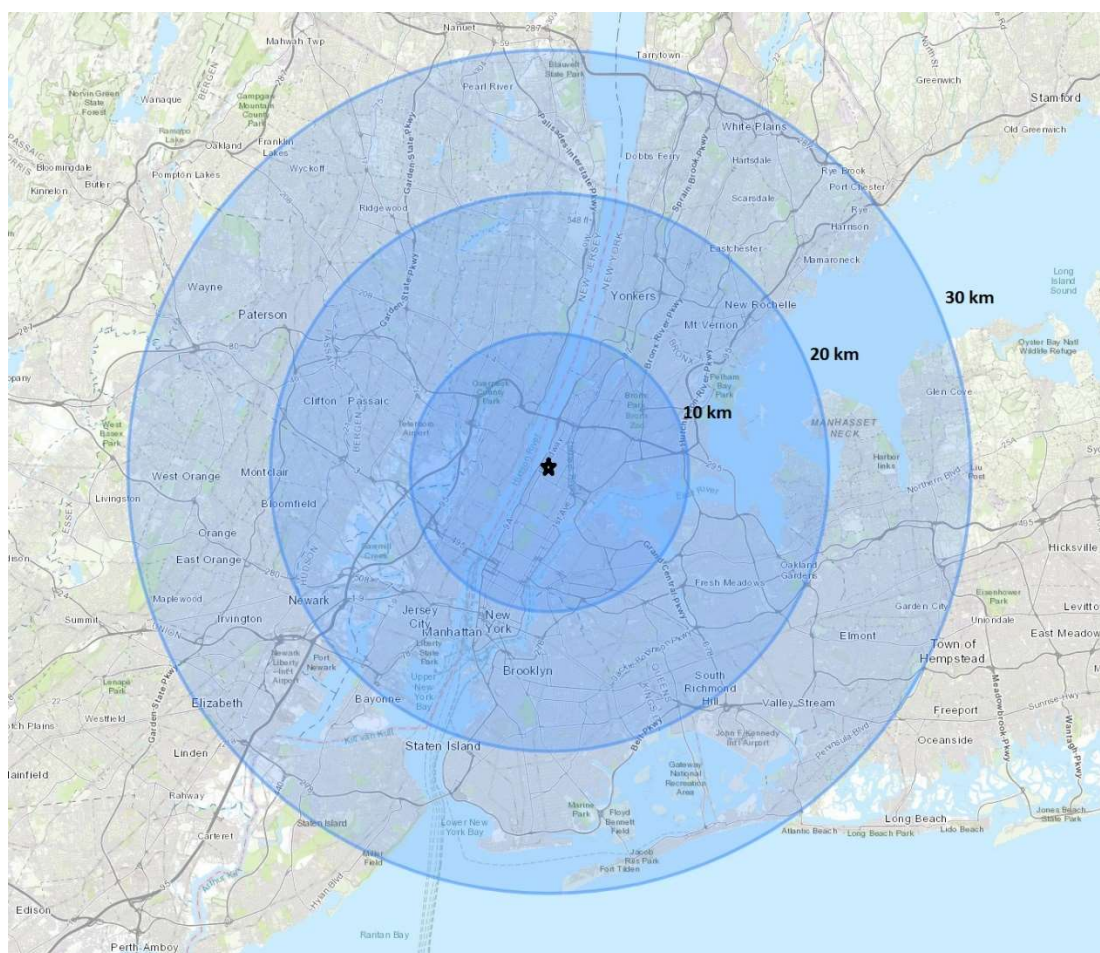

**Figure S2.** Regional map showing radial distances of 10, 20 and 30 kilometers from the sampling site (starred) at the ASRC (City University of New York). Credits: <https://www.calcmaps.com/map-radius/>

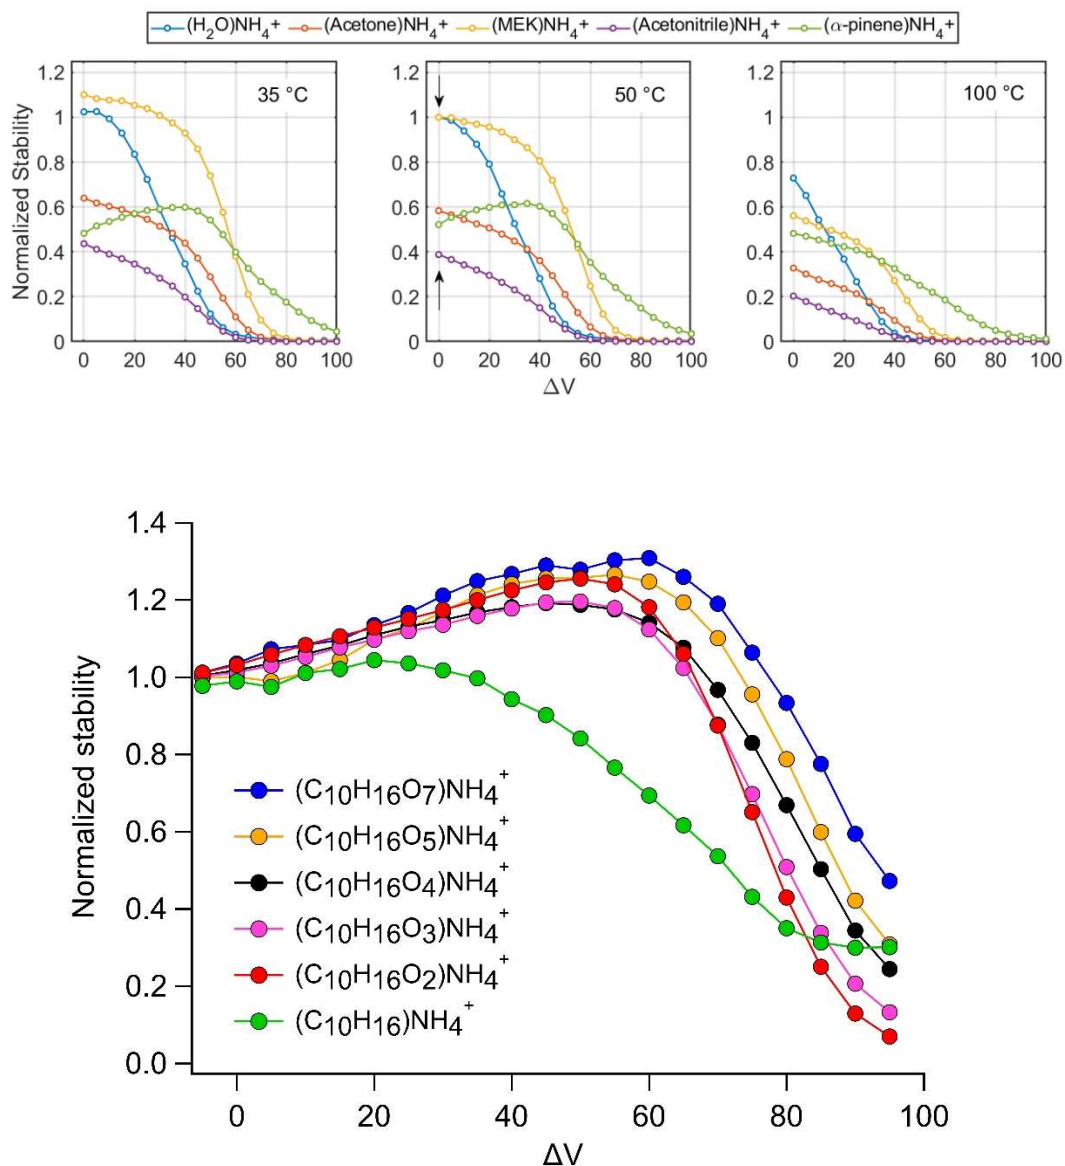

**Figure S3.** Stability of ammonium-parent ion adducts as a function of voltage and IMR temperature for select compounds including highly oxygenated species.

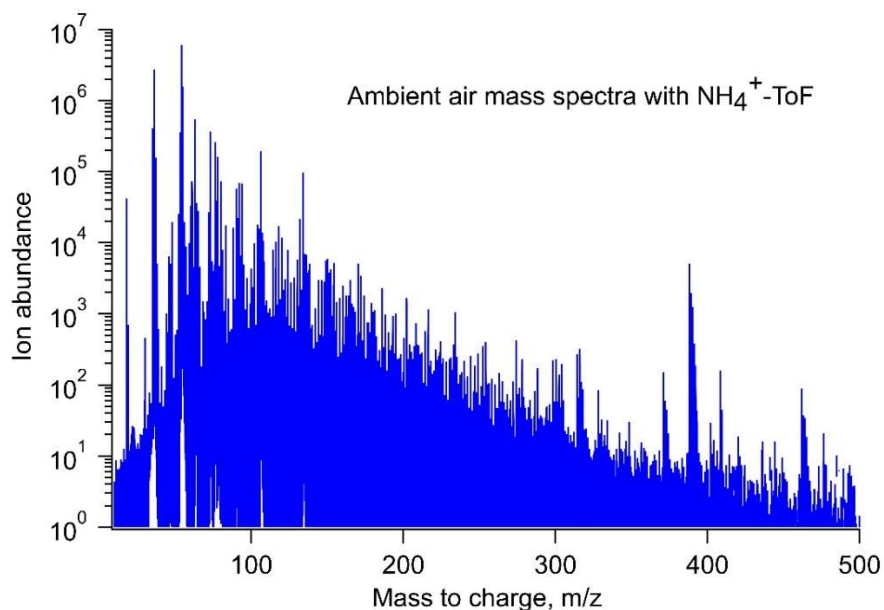

**Figure S4.** Average ambient air mass spectra collected using Vocus CI-ToF with  $\text{NH}_4^+$  as the reagent ion.

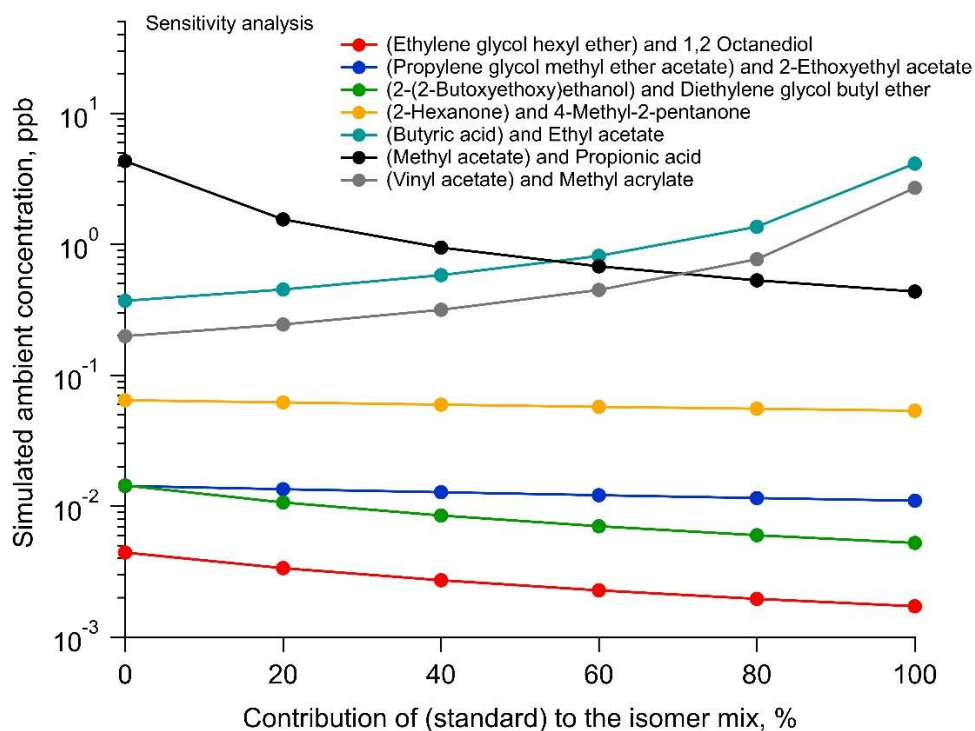

**Figure S5.** Sensitivity analysis of CI-ToF response factors comparing isomer pairs with variations in instrument sensitivity to  $\text{NH}_4^+$  ionization (using calibration standards); shown as variations in simulated concentrations of select ion formulas in response to the changes in the magnitude of the mass calibration factor dependent on relative contribution of each isomer in the pair (x-axis).

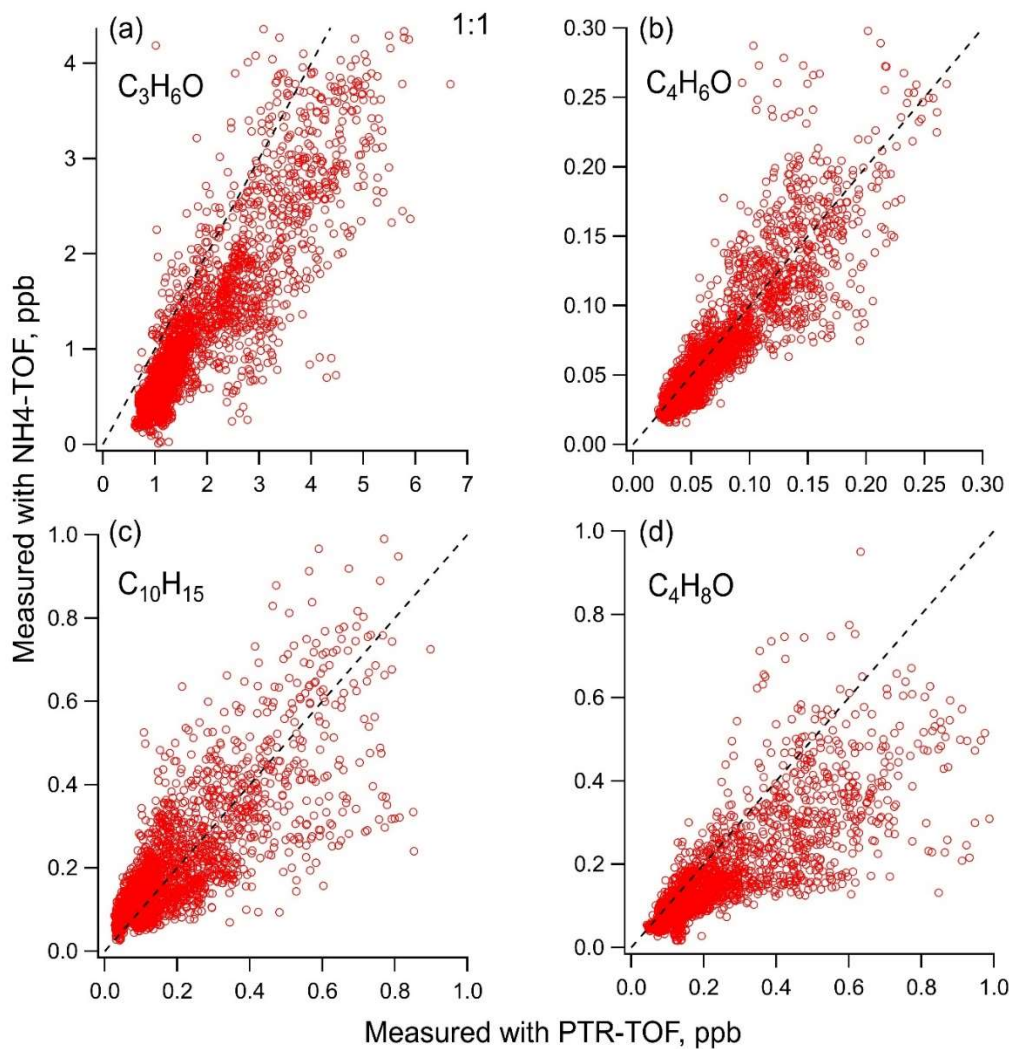

**Figure S6.** A comparison between measured concentrations of select analytes by NH<sub>4</sub>-ToF and co-located PTR-ToF (Stony Brook University) instruments over the sampling period. The spread observed in comparisons of C<sub>10</sub>H<sub>16</sub> and C<sub>4</sub>H<sub>8</sub>O could largely be attributed to variations within relative responses to isomers with the different ionization schemes of the two instruments.

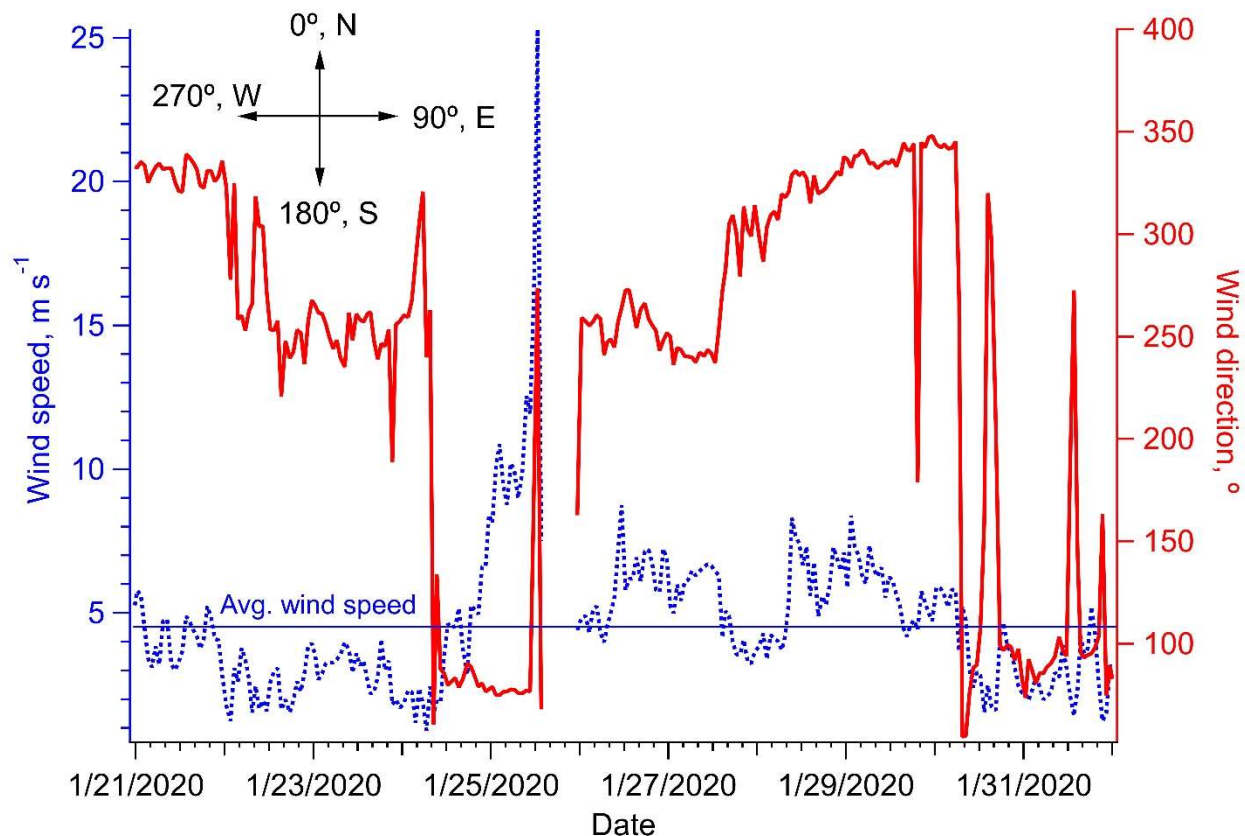

**Figure S7.** Wind speed and direction at the sampling site during the measurement period. The missing data for the on-site weather station included a period of high wind speeds and periodic heavy rain in the afternoon (until 4:30 LT) followed by calm conditions with winds from South-Northeast between 12-7 PM and West-Northwest thereafter as shown by regional data from the LaGuardia weather station.

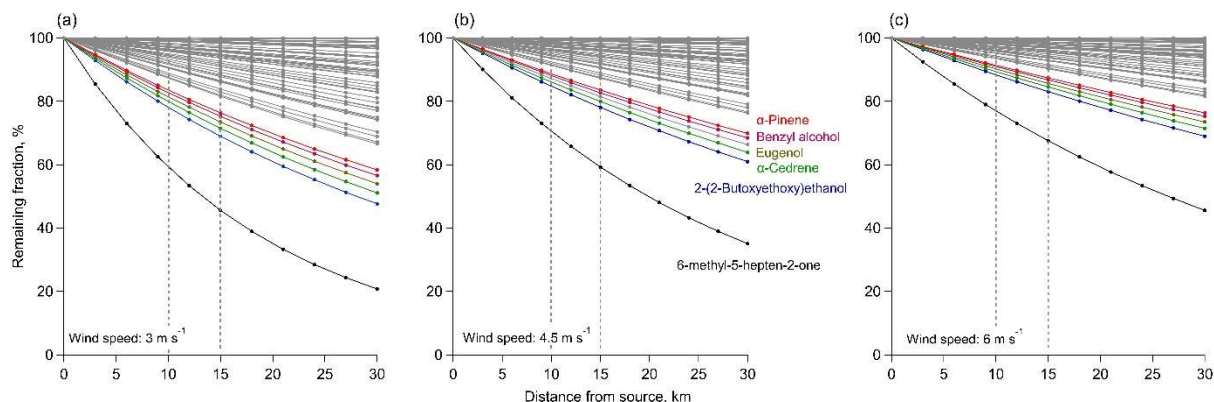

**Figure S8.** Potential chemical losses due to OH oxidation, shown as fraction remaining with distance after wintertime daytime atmospheric oxidation at different wind speeds for the chemical species listed in table S2. Note: An aerial distance of 10–15 kilometers from the sampling site at ASRC, CUNY covers the commercial areas of New York City, as well as, parts of New Jersey as shown in Figure S2. Daytime monoterpene and sesquiterpene losses may vary between specific isomers, but are shown here as  $\alpha$ -pinene and  $\alpha$ -cedrene, respectively.

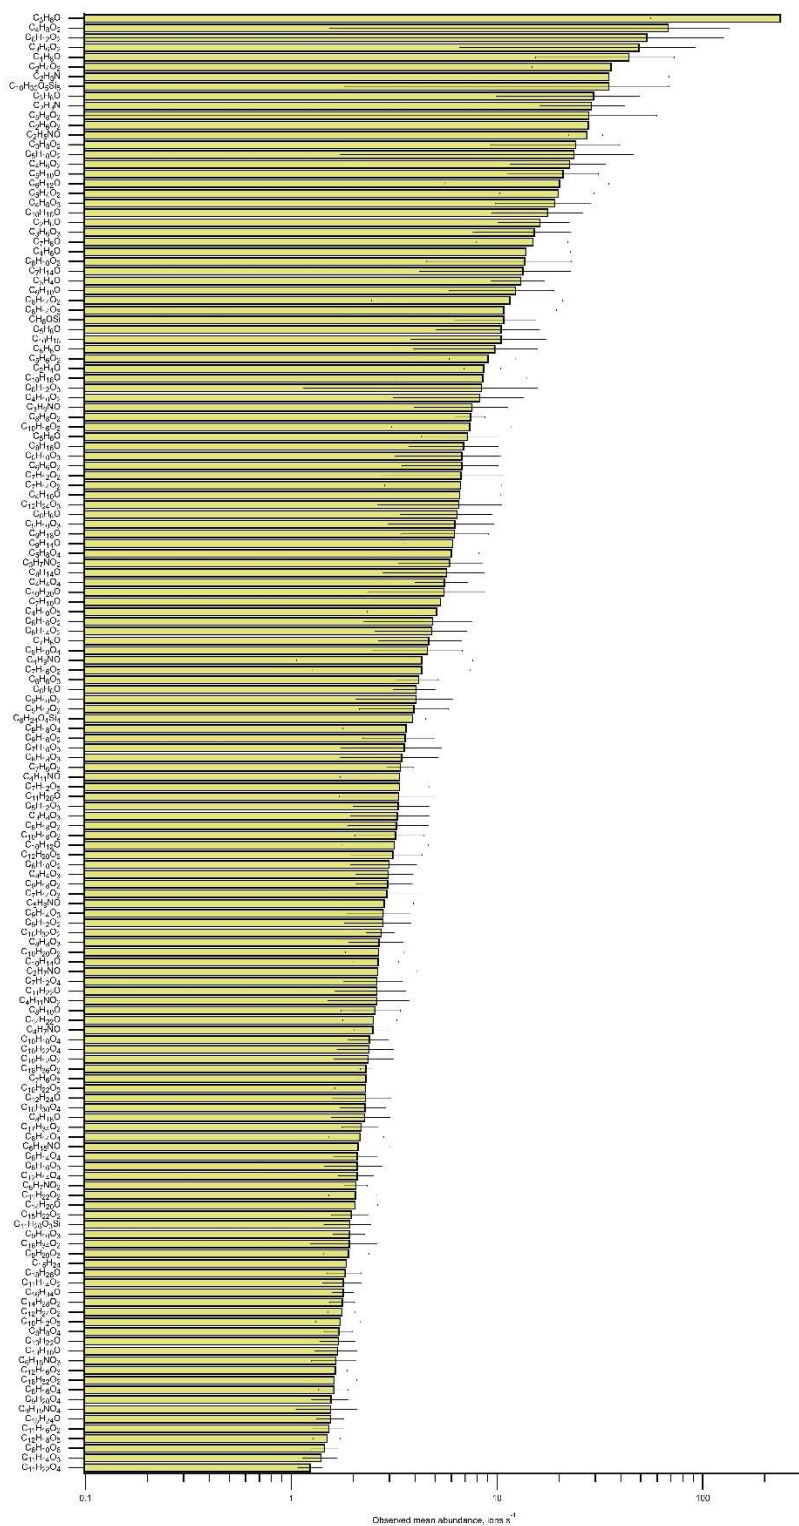

**Figure S9.** Geometric mean ion abundances of all measured ions averaged over the duration of the sampling campaign.

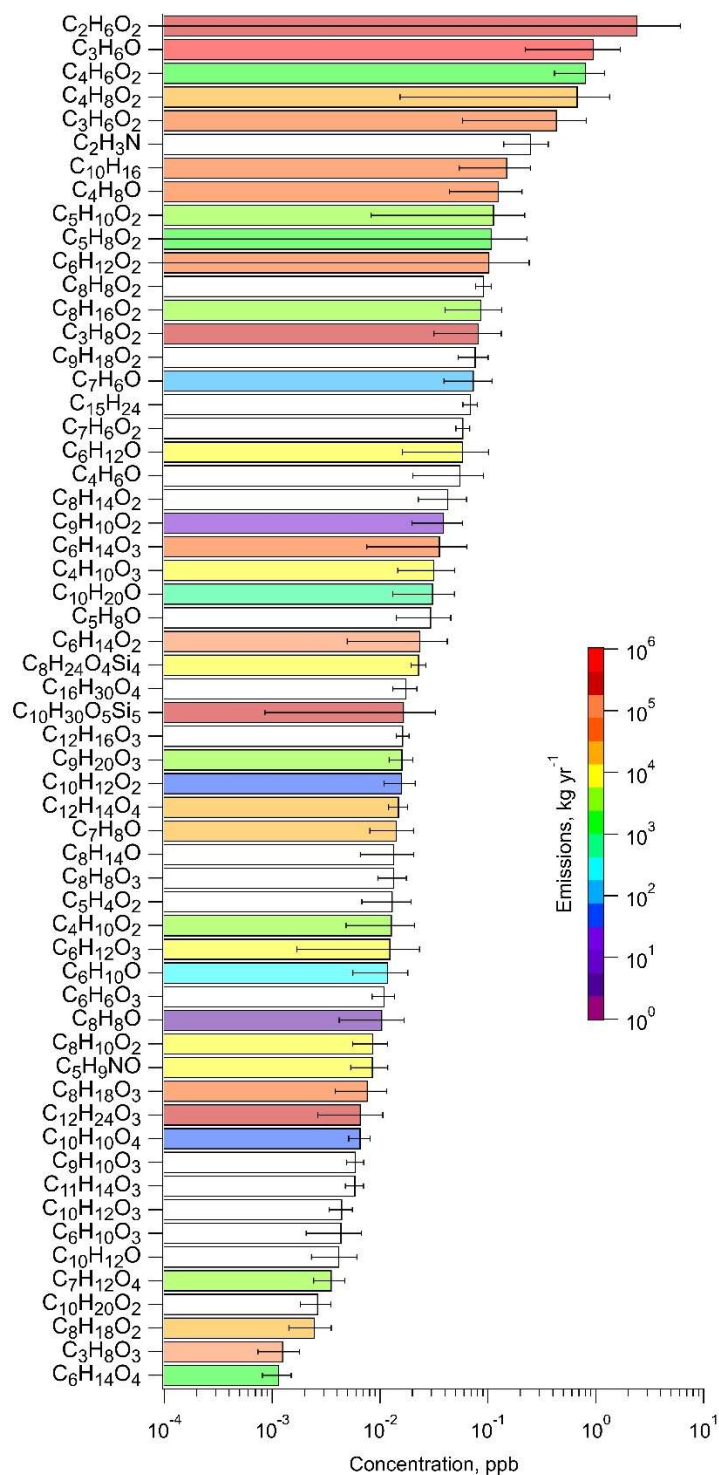

**Figure S10.** Geometric mean of absolute concentrations (i.e. without 5<sup>th</sup> percentile background subtraction) of mass calibrated ions averaged over the entire duration of the sampling campaign and color coded by their annual emissions as estimated by the VCPy inventory.

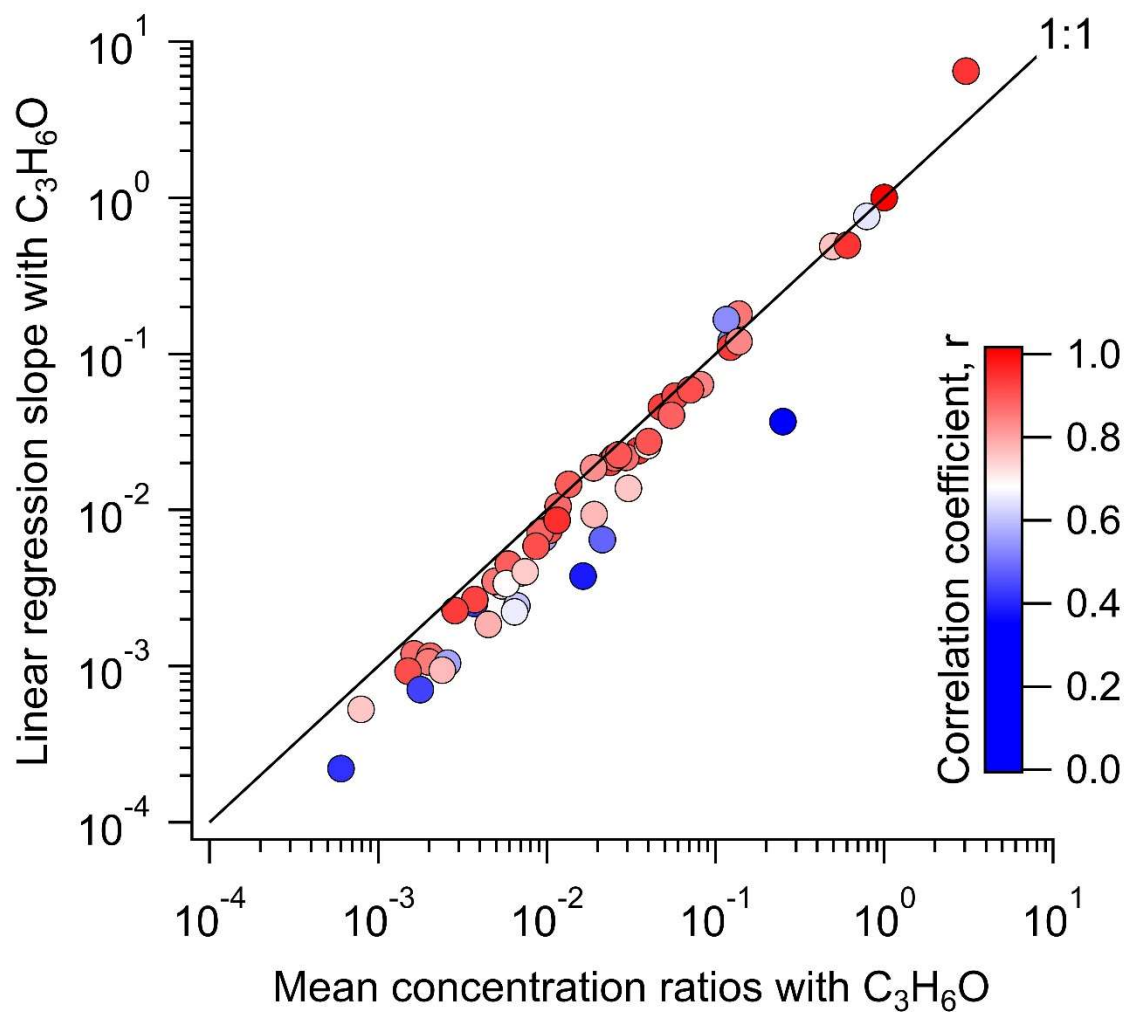

**Figure S11.** Concentration ratios of measured analytes relative to acetone as determined by linear regression slopes (y-axis) compared to background-subtracted geometric mean concentration ratios (x-axis) and colored by correlation coefficient.



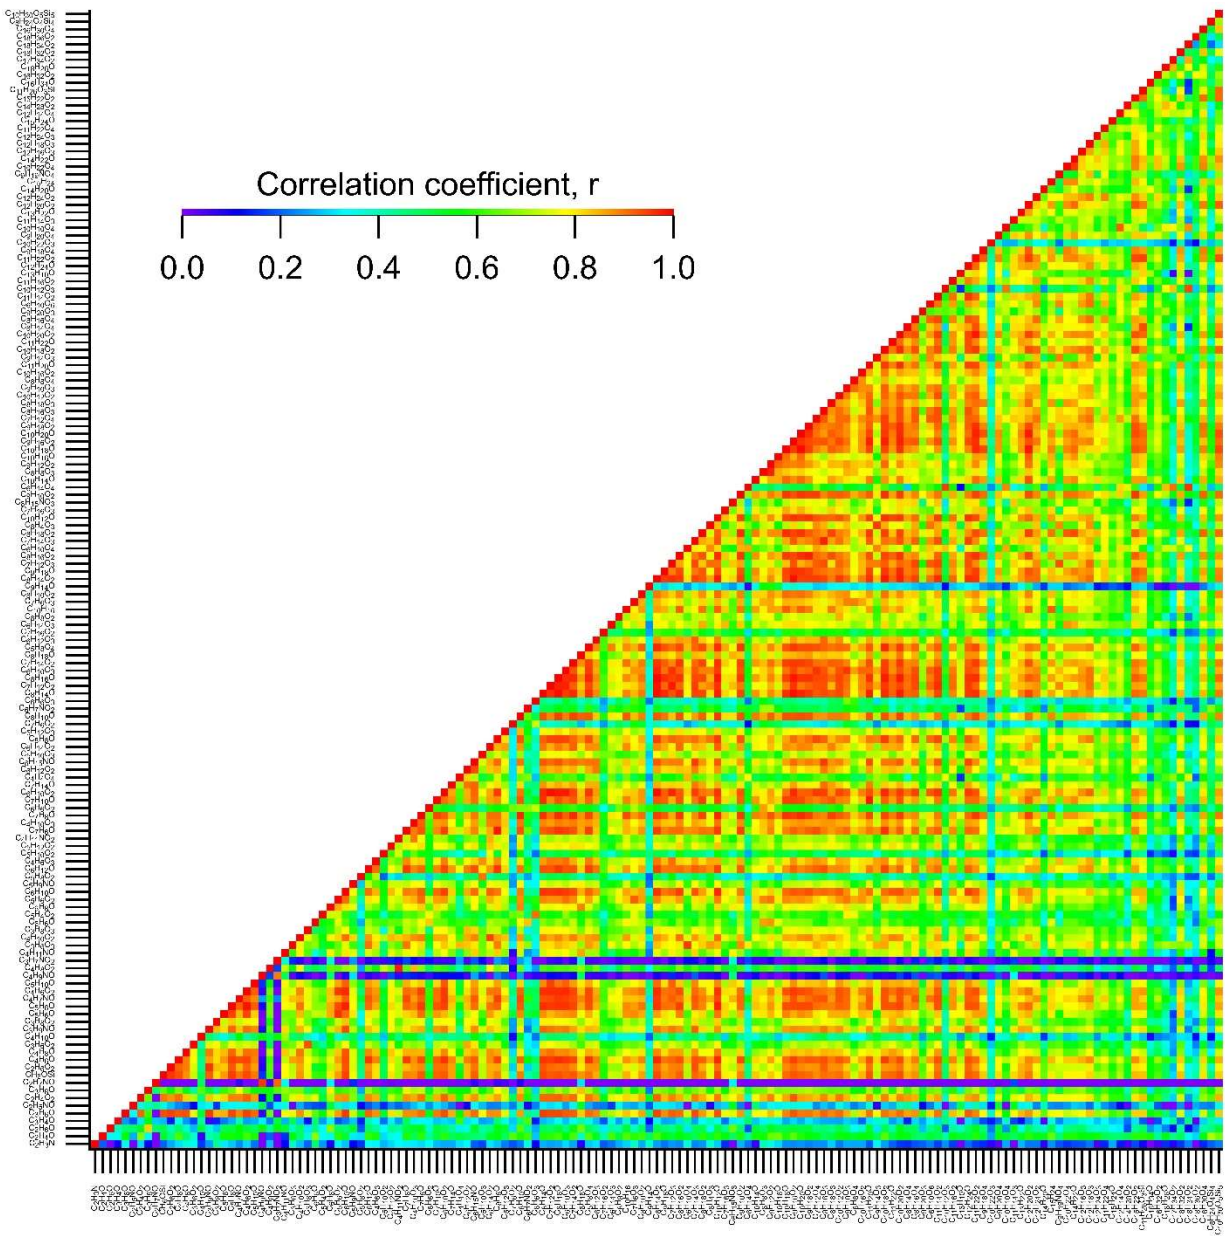

**Figure S13.** Image-based representation of the various degrees of ion abundance-based linear correlations between all measured ions.

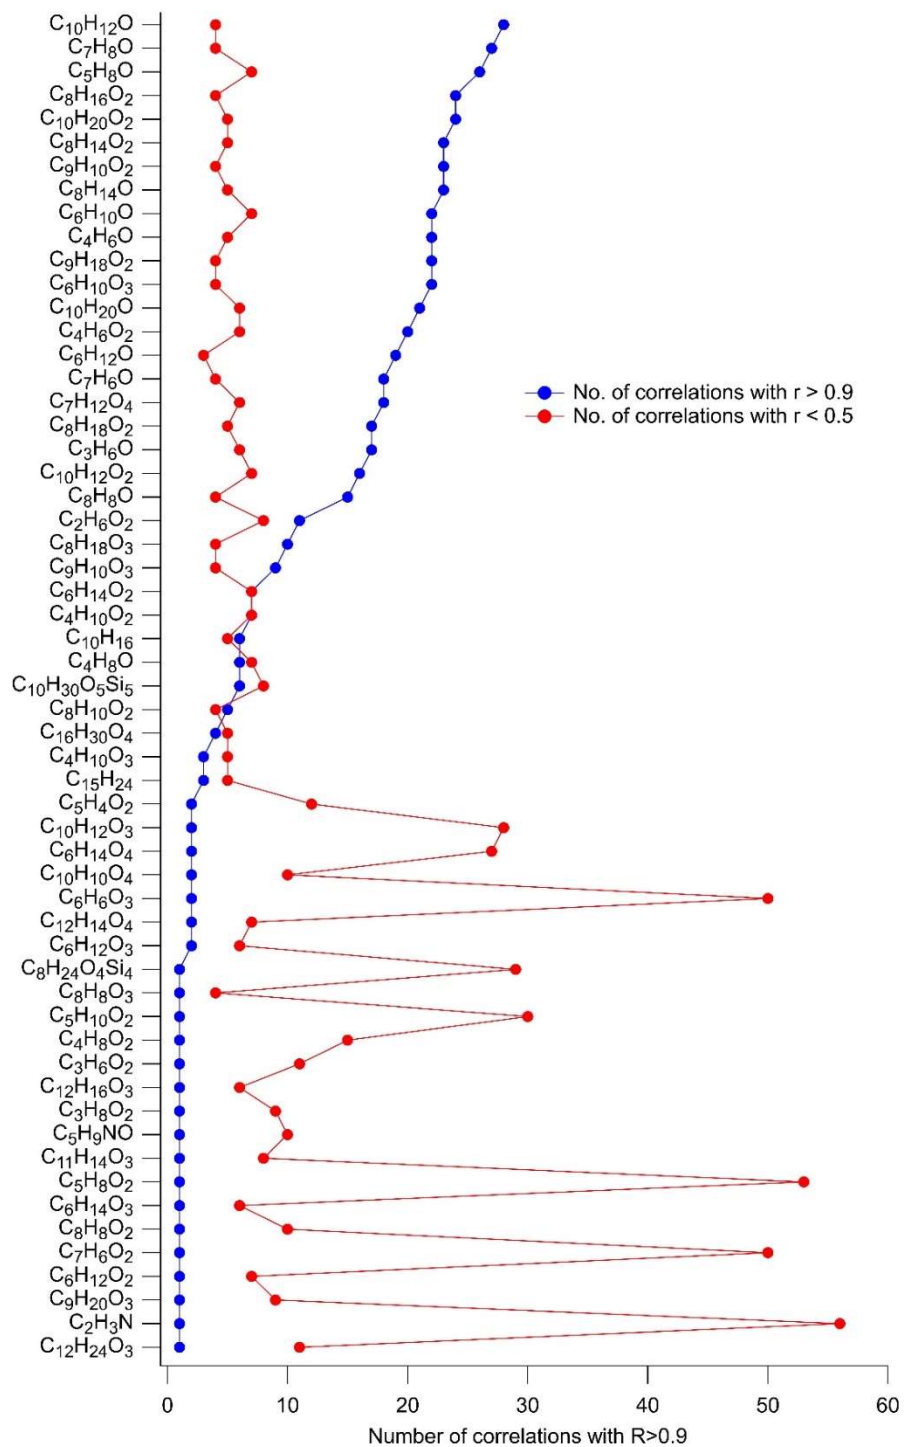

**Figure S14.** List of measured formulas sorted by ions with the highest counts of concentration-based large correlation coefficients exceeding 0.9. The number of poor correlations (i.e.  $< 0.5$ ) for each compound is also shown.

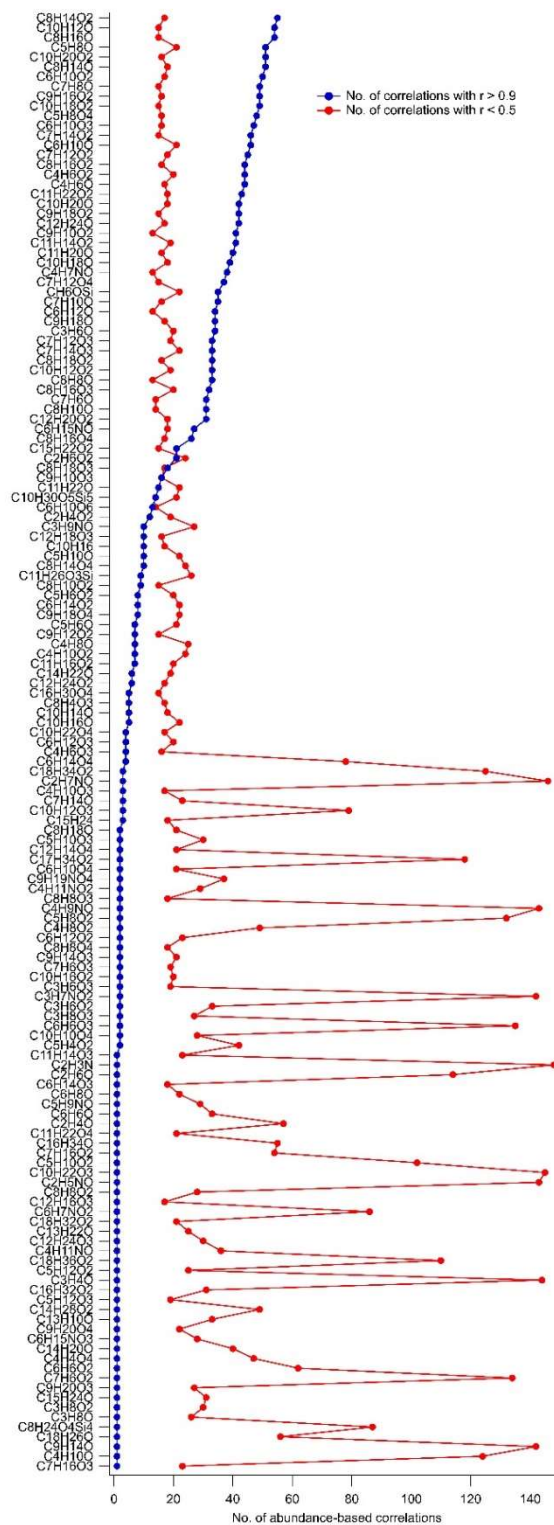

**Figure S15.** The complete list of targeted ion formulas sorted by ions with the highest counts of ion abundance-based correlation coefficients exceeding 0.9. The number of poor correlations (i.e.  $< 0.5$ ) for each compound is also shown.

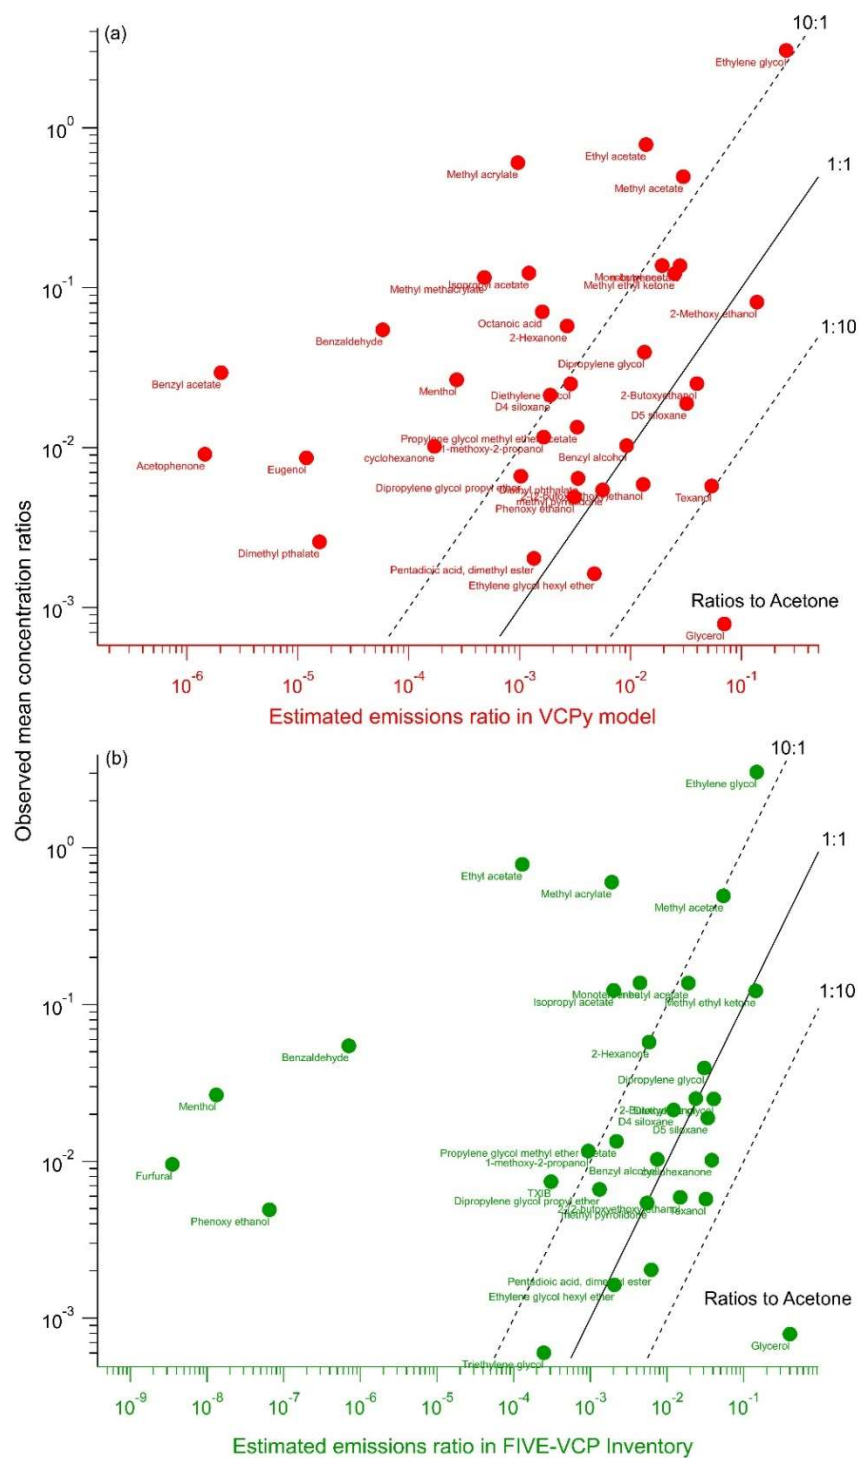

**Figure S16.** Concentration ratios versus annual emissions inventories (compared to acetone), labelled as likely isomers. Note: Supporting figure for Figure 4 showing same data.

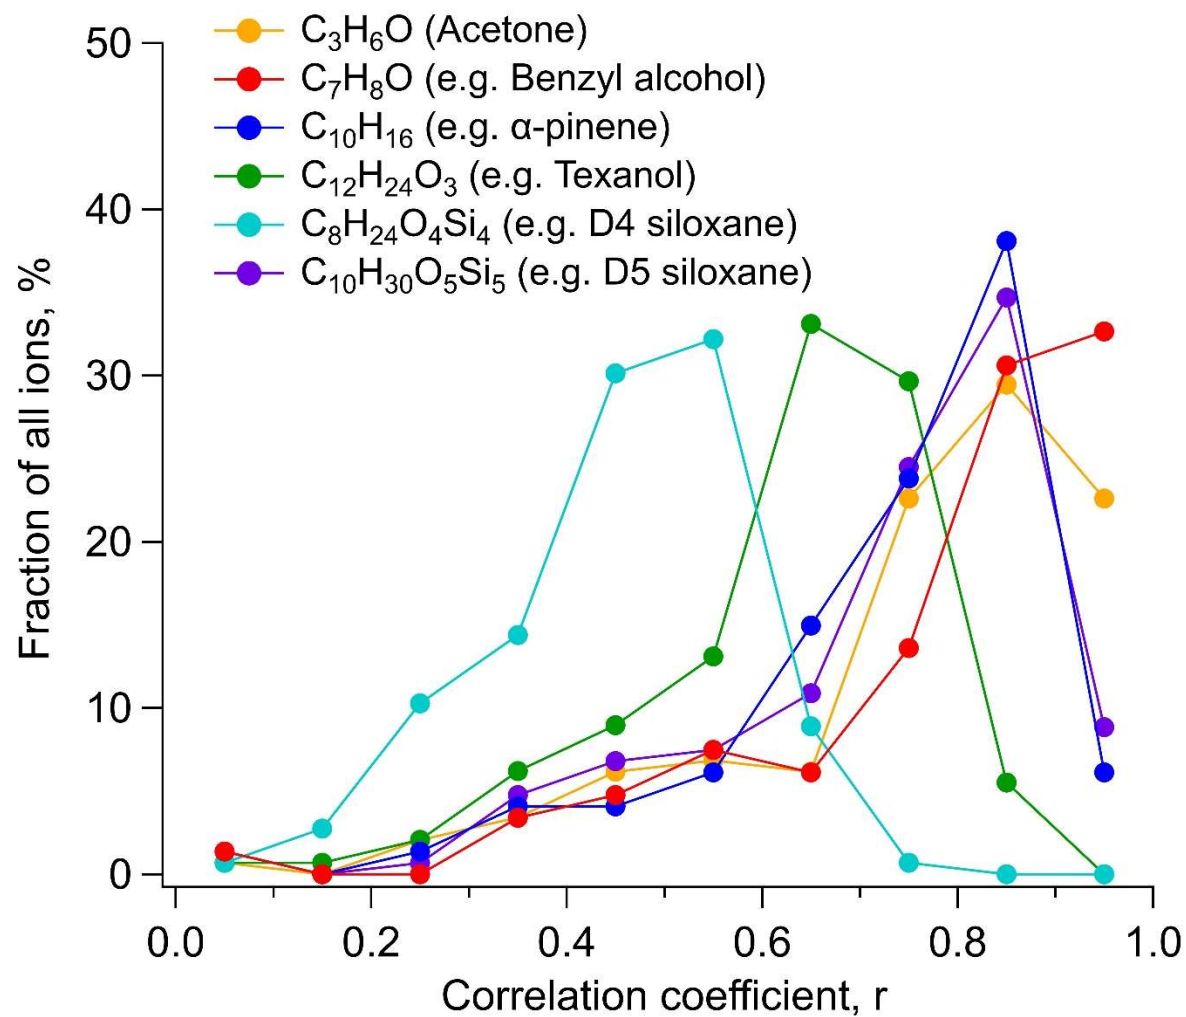

**Figure S17.** Comparison of correlation coefficients against select tracer compounds using ion abundances of all target species. Nearly 35% of the measured ions correlated highly ( $0.9 < r < 1$ ) with benzyl alcohol's ion.

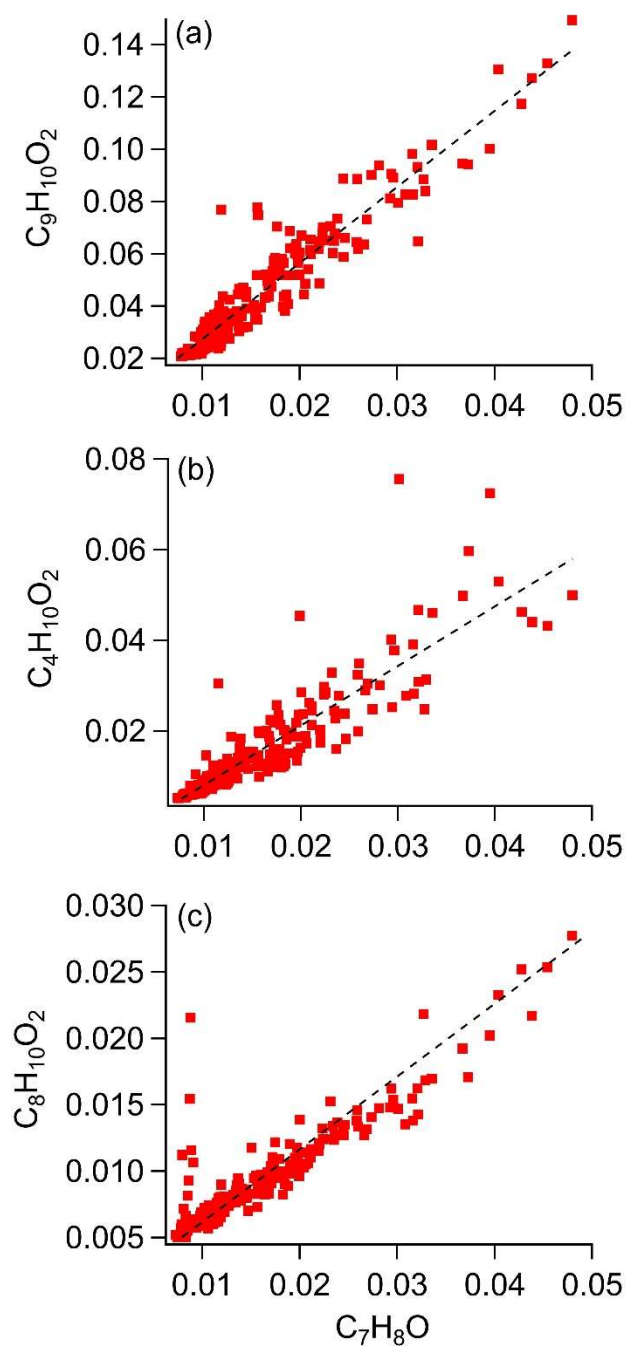

**Figure S18.** Examples of observed strong linear correlations between  $C_7H_8O$  (e.g. benzyl alcohol) and, (a)  $C_9H_{10}O_2$  (e.g. benzyl acetate) (b)  $C_4H_{10}O_2$  (e.g. 1-methoxy-2-propanol) and (c)  $C_8H_{10}O_2$  (e.g. phenoxyethanol)

**Table S1.** Chemical composition of the analytical standard cylinder (Apel-Riemer Environmental) used for mass calibration of select species.

| <b>Multicomponent calibration mixture in nitrogen</b> |                                        |
|-------------------------------------------------------|----------------------------------------|
| Compound                                              | Concentration (ppb), (uncertainty: 5%) |
| Ethanol                                               | 981                                    |
| Acetonitrile                                          | 993                                    |
| Acetone                                               | 989                                    |
| Acrylonitrile                                         | 987                                    |
| Isoprene                                              | 954                                    |
| Methyl vinyl ketone                                   | 997                                    |
| Methyl ethyl ketone                                   | 994                                    |
| Benzene                                               | 989                                    |
| o-Xylene                                              | 1003                                   |
| a-Pinene                                              | 1000                                   |
| 1,2,4-Trimethylbenzene                                | 973                                    |
| Octamethylcyclotetrasiloxane                          | 968                                    |
| Decamethylcyclopentasiloxane                          | 962                                    |
| b-Caryophyllene                                       | 99.5                                   |

**Table S2.** Mass response factors (and standard deviations) for mass calibration of select measured ions (using analytical standards; e.g. AccuStandard, Sigma-Aldrich). Standard deviations are determined based on linear regressions with multi-point LCS calibration curves. Cylinder-based standard calibrations are shown in *italics* (i.e. Table S1).

| Analytical standard                   | Formula                                                        | Res. fac. (avg) | Res. fac. (st. dev) |
|---------------------------------------|----------------------------------------------------------------|-----------------|---------------------|
| Glycerol                              | C <sub>3</sub> H <sub>8</sub> O <sub>3</sub>                   | 2617            | 923                 |
| <i>D5-siloxane</i>                    | C <sub>10</sub> H <sub>30</sub> O <sub>5</sub> Si <sub>5</sub> | 2200            | 110                 |
| Triethylene glycol                    | C <sub>6</sub> H <sub>14</sub> O <sub>4</sub>                  | 1876.504        | 71                  |
| Ethyl acetoacetate                    | C <sub>6</sub> H <sub>10</sub> O <sub>3</sub>                  | 1548.422        | 112                 |
| Furfural                              | C <sub>5</sub> H <sub>4</sub> O <sub>2</sub>                   | 1522            | 64                  |
| Ethylene glycol hexyl ether           | C <sub>8</sub> H <sub>18</sub> O <sub>2</sub>                  | 1320.445        | 40                  |
| Cyclohexanone                         | C <sub>6</sub> H <sub>10</sub> O                               | 1042.756        | 69                  |
| Hydroxycitronellal                    | C <sub>10</sub> H <sub>20</sub> O <sub>2</sub>                 | 1007.586        | 63                  |
| Texanol                               | C <sub>12</sub> H <sub>24</sub> O <sub>3</sub>                 | 995.1243        | 65                  |
| Acetophenone                          | C <sub>8</sub> H <sub>8</sub> O                                | 937.9794        | 20                  |
| Benzyl acetone                        | C <sub>10</sub> H <sub>12</sub> O                              | 761.2294        | 86                  |
| Pentadioic acid, dimethyl ester       | C <sub>7</sub> H <sub>12</sub> O <sub>4</sub>                  | 737.1291        | 60                  |
| Propylene glycol methyl ether acetate | C <sub>6</sub> H <sub>12</sub> O <sub>3</sub>                  | 679.011         | 55                  |
| 1-Methoxy-2-propanol                  | C <sub>4</sub> H <sub>10</sub> O <sub>2</sub>                  | 645.9141        | 69                  |
| n-Butyl acetate                       | C <sub>6</sub> H <sub>12</sub> O <sub>2</sub>                  | 521.7066        | 34                  |
| 2-Butoxyethanol                       | C <sub>6</sub> H <sub>14</sub> O <sub>2</sub>                  | 495.2152        | 40                  |
| 2-(2-Butoxyethoxy)ethanol             | C <sub>8</sub> H <sub>18</sub> O <sub>3</sub>                  | 450.3138        | 184                 |
| 6-Methyl 5-hepten-2-one               | C <sub>8</sub> H <sub>14</sub> O                               | 424.3785        | 11                  |
| Propyl paraben                        | C <sub>10</sub> H <sub>12</sub> O <sub>3</sub>                 | 389.7354        | 74                  |
| Maltol                                | C <sub>6</sub> H <sub>6</sub> O <sub>3</sub>                   | 380.425         | 37                  |
| Dimethyl phthalate                    | C <sub>10</sub> H <sub>10</sub> O <sub>4</sub>                 | 366.3753        | 23                  |
| Cyclopentanone                        | C <sub>5</sub> H <sub>8</sub> O                                | 355.6696        | 9                   |
| <i>Methyl ethyl ketone</i>            | C <sub>4</sub> H <sub>8</sub> O                                | 350             | 18                  |
| 2-Hexanone                            | C <sub>6</sub> H <sub>12</sub> O                               | 345.8968        | 18                  |
| Phenoxy ethanol                       | C <sub>8</sub> H <sub>10</sub> O <sub>2</sub>                  | 345.677         | 119                 |
| Methyl pyrrolidone                    | C <sub>5</sub> H <sub>9</sub> NO                               | 331.8216        | 41                  |
| Benzyl alcohol                        | C <sub>7</sub> H <sub>8</sub> O                                | 329.976         | 23                  |
| Ethyl paraben                         | C <sub>9</sub> H <sub>10</sub> O <sub>3</sub>                  | 323.4804        | 73                  |
| Dipropylene glycol                    | C <sub>6</sub> H <sub>14</sub> O <sub>3</sub>                  | 303.4106        | 43                  |
| 2-Methoxy ethanol                     | C <sub>3</sub> H <sub>8</sub> O <sub>2</sub>                   | 295.6414        | 30                  |
| Methyl methacrylate                   | C <sub>5</sub> H <sub>8</sub> O <sub>2</sub>                   | 260             | 13                  |
| <i>Acetone</i>                        | C <sub>3</sub> H <sub>6</sub> O                                | 251             | 13                  |
| <i>MVK</i>                            | C <sub>4</sub> H <sub>6</sub> O                                | 250             | 12                  |
| Butyl paraben                         | C <sub>11</sub> H <sub>14</sub> O <sub>3</sub>                 | 238.0273        | 43                  |
| Isopropyl acetate                     | C <sub>5</sub> H <sub>10</sub> O <sub>2</sub>                  | 209.0689        | 23                  |
| Benzaldehyde                          | C <sub>7</sub> H <sub>6</sub> O                                | 203.1           | 14                  |
| Methyl paraben                        | C <sub>8</sub> H <sub>8</sub> O <sub>3</sub>                   | 199.2943        | 53                  |
| Menthol                               | C <sub>10</sub> H <sub>20</sub> O                              | 180.1444        | 11                  |
| <i>D4-siloxane</i>                    | C <sub>8</sub> H <sub>24</sub> O <sub>4</sub> Si <sub>4</sub>  | 170.36          | 52.26               |
| Diethylene glycol                     | C <sub>4</sub> H <sub>10</sub> O <sub>3</sub>                  | 160.6576        | 28                  |
| Eugenol                               | C <sub>10</sub> H <sub>12</sub> O <sub>2</sub>                 | 148.3496        | 7                   |
| Diethyl phthalate                     | C <sub>12</sub> H <sub>14</sub> O <sub>4</sub>                 | 140.7306        | 8                   |
| TXIB                                  | C <sub>16</sub> H <sub>30</sub> O <sub>4</sub>                 | 131.0738        | 14                  |
| Dipropylene glycol propyl ether       | C <sub>9</sub> H <sub>20</sub> O <sub>3</sub>                  | 118.3448        | 15                  |
| <i>Acetonitrile</i>                   | C <sub>2</sub> H <sub>3</sub> N                                | 115             | 6                   |
| Methyl acetate                        | C <sub>3</sub> H <sub>6</sub> O <sub>2</sub>                   | 113.0           | 6                   |
| Cyclohexyl acetate                    | C <sub>8</sub> H <sub>14</sub> O <sub>2</sub>                  | 112.9           | 6                   |
| Benzyl acetate                        | C <sub>9</sub> H <sub>10</sub> O <sub>2</sub>                  | 104.4707        | 10                  |
| 2-Phenoxyethyl isobutyrate            | C <sub>12</sub> H <sub>16</sub> O <sub>3</sub>                 | 100.8308        | 9                   |
| Butyric acid                          | C <sub>4</sub> H <sub>8</sub> O <sub>2</sub>                   | 100.464         | 19                  |
| Methyl benzoate                       | C <sub>8</sub> H <sub>8</sub> O <sub>2</sub>                   | 81.46912        | 6                   |
| <i>Monoterpenes</i>                   | C <sub>10</sub> H <sub>16</sub>                                | 70              | 3                   |
| Benzoic acid                          | C <sub>7</sub> H <sub>6</sub> O <sub>2</sub>                   | 57.82037        | 4                   |
| Octanoic acid                         | C <sub>8</sub> H <sub>16</sub> O <sub>2</sub>                  | 56.12189        | 4                   |
| Methyl octanoate                      | C <sub>9</sub> H <sub>18</sub> O <sub>2</sub>                  | 38.58139        | 3                   |
| Vinyl acetate                         | C <sub>4</sub> H <sub>6</sub> O <sub>2</sub>                   | 28              | 2                   |
| Sesquiterpenes                        | C <sub>15</sub> H <sub>24</sub>                                | 27              | 1                   |
| Ethylene glycol                       | C <sub>2</sub> H <sub>6</sub> O <sub>2</sub>                   | 11.48517        | 1                   |

**Table S3.** Geometric mean ion abundances (ions s<sup>-1</sup>) and standard deviations measured for all calibrated and non-calibrated ions.

| Ion formula                                                    | Mean abundance ± standard deviation | Ion formula                                                   | Mean abundance ± standard deviation | Ion formula                                       | Mean abundance ± standard deviation |
|----------------------------------------------------------------|-------------------------------------|---------------------------------------------------------------|-------------------------------------|---------------------------------------------------|-------------------------------------|
| C <sub>3</sub> H <sub>6</sub> O                                | 239.76±183.96                       | C <sub>6</sub> H <sub>8</sub> O                               | 6.46±3.06                           | C <sub>4</sub> H <sub>11</sub> NO <sub>2</sub>    | 2.62±1.11                           |
| C <sub>4</sub> H <sub>8</sub> O <sub>2</sub>                   | 68.26±66.72                         | C <sub>5</sub> H <sub>10</sub> O <sub>3</sub>                 | 6.29±3.34                           | C <sub>8</sub> H <sub>10</sub> O                  | 2.57±0.82                           |
| C <sub>6</sub> H <sub>12</sub> O <sub>2</sub>                  | 53.77±71.95                         | C <sub>9</sub> H <sub>18</sub> O                              | 6.25±2.82                           | C <sub>14</sub> H <sub>22</sub> O                 | 2.52±0.74                           |
| C <sub>3</sub> H <sub>6</sub> O <sub>2</sub>                   | 49.2±42.65                          | C <sub>9</sub> H <sub>14</sub> O                              | 6.13±2.57                           | C <sub>4</sub> H <sub>7</sub> NO                  | 2.51±0.49                           |
| C <sub>4</sub> H <sub>8</sub> O                                | 43.98±28.61                         | C <sub>5</sub> H <sub>8</sub> O <sub>4</sub>                  | 6.05±2.1                            | C <sub>10</sub> H <sub>10</sub> O <sub>4</sub>    | 2.42±0.54                           |
| C <sub>2</sub> H <sub>4</sub> O <sub>2</sub>                   | 36.06±21.25                         | C <sub>3</sub> H <sub>7</sub> NO <sub>2</sub>                 | 5.92±2.61                           | C <sub>10</sub> H <sub>22</sub> O <sub>4</sub>    | 2.4±0.74                            |
| C <sub>10</sub> H <sub>30</sub> O <sub>5</sub> Si <sub>5</sub> | 35.12±33.31                         | C <sub>8</sub> H <sub>14</sub> O                              | 5.74±2.96                           | C <sub>10</sub> H <sub>12</sub> O <sub>2</sub>    | 2.38±0.76                           |
| C <sub>3</sub> H <sub>8</sub> O                                | 29.66±19.76                         | C <sub>4</sub> H <sub>4</sub> O <sub>4</sub>                  | 5.59±1.59                           | C <sub>18</sub> H <sub>36</sub> O <sub>2</sub>    | 2.33±0.16                           |
| C <sub>2</sub> H <sub>3</sub> N                                | 28.91±12.8                          | C <sub>10</sub> H <sub>20</sub> O                             | 5.57±3.22                           | C <sub>7</sub> H <sub>6</sub> O <sub>3</sub>      | 2.32±0.22                           |
| C <sub>5</sub> H <sub>8</sub> O <sub>2</sub>                   | 28.07±31.59                         | C <sub>7</sub> H <sub>10</sub> O                              | 5.35±3.01                           | C <sub>10</sub> H <sub>22</sub> O <sub>3</sub>    | 2.31±0.69                           |
| C <sub>2</sub> H <sub>4</sub> O <sub>2</sub>                   | 27.99±41.6                          | C <sub>4</sub> H <sub>10</sub> O <sub>3</sub>                 | 5.11±2.77                           | C <sub>12</sub> H <sub>24</sub> O                 | 2.31±0.73                           |
| C <sub>2</sub> H <sub>5</sub> NO                               | 27.5±5.14                           | C <sub>8</sub> H <sub>16</sub> O <sub>2</sub>                 | 4.89±2.65                           | C <sub>16</sub> H <sub>30</sub> O <sub>4</sub>    | 2.3±0.57                            |
| C <sub>3</sub> H <sub>8</sub> O <sub>2</sub>                   | 24.32±14.97                         | C <sub>8</sub> H <sub>14</sub> O <sub>2</sub>                 | 4.85±2.3                            | C <sub>8</sub> H <sub>18</sub> O                  | 2.29±0.73                           |
| C <sub>5</sub> H <sub>10</sub> O <sub>2</sub>                  | 23.79±22.06                         | C <sub>7</sub> H <sub>8</sub> O                               | 4.7±2.05                            | C <sub>17</sub> H <sub>34</sub> O <sub>2</sub>    | 2.2±0.44                            |
| C <sub>4</sub> H <sub>6</sub> O <sub>2</sub>                   | 22.68±11.09                         | C <sub>6</sub> H <sub>10</sub> O <sub>4</sub>                 | 4.62±2.15                           | C <sub>6</sub> H <sub>14</sub> O <sub>4</sub>     | 2.17±0.65                           |
| C <sub>5</sub> H <sub>10</sub> O                               | 21.12±9.91                          | C <sub>4</sub> H <sub>9</sub> NO                              | 4.35±3.29                           | C <sub>6</sub> H <sub>15</sub> NO                 | 2.12±0.9                            |
| C <sub>6</sub> H <sub>12</sub> O                               | 20.24±14.68                         | C <sub>7</sub> H <sub>16</sub> O <sub>2</sub>                 | 4.34±3.08                           | C <sub>8</sub> H <sub>14</sub> O <sub>4</sub>     | 2.11±0.51                           |
| C <sub>5</sub> H <sub>4</sub> O <sub>2</sub>                   | 19.93±9.62                          | C <sub>6</sub> H <sub>6</sub> O <sub>3</sub>                  | 4.18±0.97                           | C <sub>8</sub> H <sub>16</sub> O <sub>3</sub>     | 2.11±0.66                           |
| C <sub>4</sub> H <sub>6</sub> O <sub>3</sub>                   | 19.25±9.42                          | C <sub>6</sub> H <sub>6</sub> O                               | 4.07±0.94                           | C <sub>12</sub> H <sub>14</sub> O <sub>4</sub>    | 2.11±0.42                           |
| C <sub>10</sub> H <sub>16</sub> O                              | 17.72±8.34                          | C <sub>9</sub> H <sub>10</sub> O <sub>2</sub>                 | 4.07±2.01                           | C <sub>6</sub> H <sub>7</sub> NO <sub>2</sub>     | 2.08±0.26                           |
| C <sub>2</sub> H <sub>6</sub> O                                | 16.29±6.17                          | C <sub>5</sub> H <sub>12</sub> O <sub>2</sub>                 | 3.97±1.83                           | C <sub>11</sub> H <sub>22</sub> O <sub>2</sub>    | 2.07±0.55                           |
| C <sub>3</sub> H <sub>6</sub> O <sub>3</sub>                   | 15.28±7.64                          | C <sub>8</sub> H <sub>24</sub> O <sub>4</sub> Si <sub>4</sub> | 3.91±0.6                            | C <sub>14</sub> H <sub>20</sub> O                 | 2.05±0.58                           |
| C <sub>7</sub> H <sub>6</sub> O                                | 15.03±7.09                          | C <sub>9</sub> H <sub>18</sub> O <sub>4</sub>                 | 3.64±1.86                           | C <sub>15</sub> H <sub>22</sub> O <sub>2</sub>    | 1.97±0.4                            |
| C <sub>4</sub> H <sub>8</sub> O                                | 13.89±8.85                          | C <sub>9</sub> H <sub>16</sub> O <sub>2</sub>                 | 3.61±1.38                           | C <sub>11</sub> H <sub>26</sub> O <sub>3</sub> Si | 1.94±0.5                            |
| C <sub>6</sub> H <sub>10</sub> O <sub>2</sub>                  | 13.75±9.21                          | C <sub>7</sub> H <sub>16</sub> O <sub>3</sub>                 | 3.57±1.82                           | C <sub>9</sub> H <sub>10</sub> O <sub>3</sub>     | 1.93±0.34                           |
| C <sub>7</sub> H <sub>14</sub> O                               | 13.47±9.28                          | C <sub>8</sub> H <sub>18</sub> O <sub>3</sub>                 | 3.46±1.73                           | C <sub>18</sub> H <sub>34</sub> O <sub>2</sub>    | 1.93±0.69                           |
| C <sub>3</sub> H <sub>4</sub> O                                | 13.13±3.82                          | C <sub>7</sub> H <sub>6</sub> O <sub>2</sub>                  | 3.42±0.5                            | C <sub>9</sub> H <sub>20</sub> O <sub>3</sub>     | 1.91±0.47                           |
| C <sub>6</sub> H <sub>10</sub> O                               | 12.39±6.54                          | C <sub>4</sub> H <sub>11</sub> NO                             | 3.38±1.66                           | C <sub>15</sub> H <sub>24</sub>                   | 1.87±0.29                           |
| C <sub>6</sub> H <sub>14</sub> O <sub>2</sub>                  | 11.62±9.17                          | C <sub>7</sub> H <sub>12</sub> O <sub>3</sub>                 | 3.38±1.29                           | C <sub>18</sub> H <sub>26</sub> O                 | 1.84±0.34                           |
| C <sub>6</sub> H <sub>14</sub> O <sub>3</sub>                  | 10.87±8.58                          | C <sub>11</sub> H <sub>20</sub> O                             | 3.35±1.64                           | C <sub>11</sub> H <sub>14</sub> O <sub>2</sub>    | 1.81±0.38                           |
| CH <sub>6</sub> OSi                                            | 10.85±4.6                           | C <sub>5</sub> H <sub>12</sub> O <sub>3</sub>                 | 3.34±1.34                           | C <sub>16</sub> H <sub>34</sub> O                 | 1.8±0.21                            |
| C <sub>5</sub> H <sub>8</sub> O                                | 10.56±5.52                          | C <sub>3</sub> H <sub>8</sub> O <sub>3</sub>                  | 3.31±1.37                           | C <sub>14</sub> H <sub>28</sub> O <sub>2</sub>    | 1.78±0.24                           |
| C <sub>10</sub> H <sub>16</sub>                                | 10.55±6.75                          | C <sub>8</sub> H <sub>18</sub> O <sub>2</sub>                 | 3.27±1.39                           | C <sub>12</sub> H <sub>24</sub> O <sub>2</sub>    | 1.78±0.27                           |
| C <sub>8</sub> H <sub>8</sub> O                                | 9.82±5.9                            | C <sub>10</sub> H <sub>18</sub> O <sub>2</sub>                | 3.23±1.19                           | C <sub>10</sub> H <sub>12</sub> O <sub>3</sub>    | 1.74±0.42                           |
| C <sub>5</sub> H <sub>6</sub> O <sub>2</sub>                   | 9.1±3.23                            | C <sub>10</sub> H <sub>12</sub> O                             | 3.19±1.43                           | C <sub>8</sub> H <sub>8</sub> O <sub>4</sub>      | 1.72±0.27                           |
| C <sub>2</sub> H <sub>4</sub> O                                | 8.67±1.77                           | C <sub>12</sub> H <sub>20</sub> O <sub>2</sub>                | 3.14±1.19                           | C <sub>13</sub> H <sub>22</sub> O                 | 1.71±0.33                           |
| C <sub>10</sub> H <sub>18</sub> O                              | 8.58±5.34                           | C <sub>8</sub> H <sub>10</sub> O <sub>2</sub>                 | 3±1.07                              | C <sub>13</sub> H <sub>10</sub> O                 | 1.69±0.39                           |
| C <sub>6</sub> H <sub>12</sub> O <sub>3</sub>                  | 8.45±7.3                            | C <sub>8</sub> H <sub>4</sub> O <sub>3</sub>                  | 2.98±0.92                           | C <sub>6</sub> H <sub>15</sub> NO <sub>3</sub>    | 1.66±0.41                           |
| C <sub>4</sub> H <sub>10</sub> O <sub>2</sub>                  | 8.29±5.17                           | C <sub>9</sub> H <sub>18</sub> O <sub>2</sub>                 | 2.96±0.91                           | C <sub>12</sub> H <sub>16</sub> O <sub>3</sub>    | 1.65±0.22                           |
| C <sub>3</sub> H <sub>9</sub> NO                               | 7.62±3.67                           | C <sub>7</sub> H <sub>14</sub> O <sub>3</sub>                 | 2.94±1.41                           | C <sub>18</sub> H <sub>32</sub> O <sub>2</sub>    | 1.62±0.46                           |
| C <sub>8</sub> H <sub>8</sub> O <sub>2</sub>                   | 7.49±1.25                           | C <sub>5</sub> H <sub>9</sub> NO                              | 2.85±1.07                           | C <sub>8</sub> H <sub>16</sub> O <sub>4</sub>     | 1.62±0.27                           |
| C <sub>10</sub> H <sub>16</sub> O <sub>2</sub>                 | 7.41±4.34                           | C <sub>9</sub> H <sub>14</sub> O <sub>3</sub>                 | 2.82±0.97                           | C <sub>9</sub> H <sub>20</sub> O <sub>4</sub>     | 1.58±0.32                           |
| C <sub>5</sub> H <sub>6</sub> O                                | 7.22±2.94                           | C <sub>9</sub> H <sub>12</sub> O <sub>2</sub>                 | 2.81±1                              | C <sub>9</sub> H <sub>19</sub> NO <sub>4</sub>    | 1.57±0.51                           |
| C <sub>8</sub> H <sub>16</sub> O                               | 6.92±3.2                            | C <sub>16</sub> H <sub>32</sub> O <sub>2</sub>                | 2.75±0.43                           | C <sub>15</sub> H <sub>24</sub> O                 | 1.56±0.24                           |
| C <sub>6</sub> H <sub>10</sub> O <sub>3</sub>                  | 6.8±3.59                            | C <sub>8</sub> H <sub>8</sub> O <sub>3</sub>                  | 2.69±0.8                            | C <sub>11</sub> H <sub>16</sub> O <sub>2</sub>    | 1.53±0.26                           |
| C <sub>6</sub> H <sub>6</sub> O <sub>2</sub>                   | 6.79±3.34                           | C <sub>10</sub> H <sub>20</sub> O <sub>2</sub>                | 2.68±0.84                           | C <sub>12</sub> H <sub>18</sub> O <sub>3</sub>    | 1.5±0.23                            |
| C <sub>7</sub> H <sub>12</sub> O <sub>2</sub>                  | 6.71±3.96                           | C <sub>10</sub> H <sub>14</sub> O                             | 2.66±0.65                           | C <sub>6</sub> H <sub>10</sub> O <sub>6</sub>     | 1.46±0.23                           |
| C <sub>7</sub> H <sub>14</sub> O <sub>2</sub>                  | 6.69±3.85                           | C <sub>2</sub> H <sub>7</sub> NO                              | 2.65±1.42                           | C <sub>11</sub> H <sub>14</sub> O <sub>3</sub>    | 1.4±0.27                            |
| C <sub>4</sub> H <sub>10</sub> O                               | 6.63±3.77                           | C <sub>7</sub> H <sub>12</sub> O <sub>4</sub>                 | 2.62±0.84                           | C <sub>11</sub> H <sub>22</sub> O <sub>4</sub>    | 1.25±0.17                           |
| C <sub>12</sub> H <sub>24</sub> O <sub>3</sub>                 | 6.58±3.95                           | C <sub>11</sub> H <sub>22</sub> O                             | 2.62±0.99                           |                                                   |                                     |

**Table S4.** List of the calibrated ion formulas measured using the  $\text{NH}_4^+$ -ToF instrument, their possible chemical names and examples of known uses. Listed examples (for calibrated compounds and other potential isomers) are not intended to be comprehensive, but provide examples of common uses that can aid in the interpretation of observations.

| Mass calibrated ions                              | Analytical standards used                   | Other likely contributing isomers                                       | Example uses/sources of all listed isomers                               |
|---------------------------------------------------|---------------------------------------------|-------------------------------------------------------------------------|--------------------------------------------------------------------------|
| $\text{C}_{10}\text{H}_{30}\text{O}_5\text{Si}_5$ | D5-siloxane                                 |                                                                         | Cosmetic products, antiperspirants                                       |
| $\text{C}_6\text{H}_{14}\text{O}_4$               | Triethylene glycol                          |                                                                         | Automobile fluids, lubricants, solvents                                  |
| $\text{C}_6\text{H}_{10}\text{O}_3$               | Ethyl acetoacetate                          |                                                                         |                                                                          |
| $\text{C}_5\text{H}_4\text{O}_2$                  | Furfural                                    |                                                                         | Feedstock chemical, specialty solvent, wood off-gassing, biomass burning |
| $\text{C}_8\text{H}_{18}\text{O}_2$               | Ethylene glycol hexyl ether; 1,2 Octanediol |                                                                         |                                                                          |
| $\text{C}_6\text{H}_{10}\text{O}$                 | Cyclohexanone                               |                                                                         | Solvent for paints, degreasers, polymers, etc.                           |
| $\text{C}_{10}\text{H}_{20}\text{O}_2$            | Hydroxycitronellal                          | Octyl acetate, p-Menthane-3,8-diol                                      | Fragrances, solvents, insect repellants                                  |
| $\text{C}_{12}\text{H}_{24}\text{O}_3$            | Texanol                                     |                                                                         | Paint solvent, other solvents                                            |
| $\text{C}_8\text{H}_8\text{O}$                    | Acetophenone                                | 2-methyl benzaldehyde, phenyl acetaldehyde                              | Automobile exhaust, fragrances                                           |
| $\text{C}_{10}\text{H}_{12}\text{O}$              | Benzyl acetone                              | Anethole, Estragole, Cuminaldehyde                                      | Perfumery, cosmetic products                                             |
| $\text{C}_7\text{H}_{12}\text{O}_4$               | Pentadioic acid, dimethyl ester             | Diethyl malonate                                                        | Fragrances                                                               |
| $\text{C}_6\text{H}_{12}\text{O}_3$               | PGMEA; 2-Ethoxyethyl acetate                |                                                                         | Coatings, printing inks, deicing formulations                            |
| $\text{C}_4\text{H}_{10}\text{O}_2$               | 1-Methoxy-2-propanol                        | 2-Ethoxyethanol, 1,4 Butanediol                                         | Industrial solvent                                                       |
| $\text{C}_6\text{H}_{12}\text{O}_2$               | Butyl acetate                               | Propyl propanoate, Methyl pentanoate, Ethyl butyrate, Diacetone alcohol | Fragrances, paints, solvents                                             |
| $\text{C}_6\text{H}_{14}\text{O}_2$               | 2-Butoxyethanol                             | 2-Methyl-2,4-pentanediol                                                | Solvents, cosmetic products, coatings, surfactant stabilizer             |
| $\text{C}_3\text{H}_8\text{O}_2$                  | 2-Methoxy ethanol; Propylene glycol         | Dimethoxymethane                                                        | Solvent for varnishes, dyes, wood stains                                 |
| $\text{C}_8\text{H}_{18}\text{O}_3$               | 2-(2-Butoxyethoxy)ethanol; DGBE             |                                                                         | Paints, inks, surface cleaners, varnishes                                |
| $\text{C}_8\text{H}_{14}\text{O}$                 | 6-Methyl 5-hepten-2-one                     | Filbertone                                                              | Skin oil oxidation product, fragrances                                   |
| $\text{C}_{10}\text{H}_{12}\text{O}_3$            | Propyl paraben                              |                                                                         | Cosmetics                                                                |
| $\text{C}_6\text{H}_6\text{O}_3$                  | Maltol                                      | Pyrogallol, Hydroxymethylfurfural                                       | Dyes, other industrial processing, food additive                         |
| $\text{C}_{10}\text{H}_{10}\text{O}_4$            | Dimethyl phthalate                          |                                                                         | Insect repellents, lacquer coatings, plastics                            |
| $\text{C}_5\text{H}_8\text{O}$                    | Cyclopentanone                              | 3-Penten-2-one                                                          | Precursor to fragrances, flavoring agent                                 |
| $\text{C}_4\text{H}_8\text{O}$                    | Methyl ethyl ketone                         | Tetrahydrofuran                                                         | Paints, dyes, adhesive remover, degreasers, solvent                      |
| $\text{C}_6\text{H}_{12}\text{O}$                 | 2-Hexanone; 4-Methyl-2-pentanone            | Methyl isobutyl ketone                                                  | Solvent                                                                  |
| $\text{C}_8\text{H}_{10}\text{O}_2$               | Phenoxy ethanol                             | Anisyl alcohol, 1,4-Dimethoxybenzene                                    | Fragrances, soaps                                                        |
| $\text{C}_5\text{H}_9\text{NO}$                   | Methyl pyrrolidone                          |                                                                         | Industrial solvent                                                       |
| $\text{C}_7\text{H}_8\text{O}$                    | Benzyl alcohol                              | Anisole                                                                 | General solvent                                                          |
| $\text{C}_9\text{H}_{10}\text{O}_3$               | Ethyl paraben                               | Ethyl salicylate                                                        | Cosmetics                                                                |
| $\text{C}_6\text{H}_{14}\text{O}_3$               | Dipropylene glycol                          | 2-(2-Ethoxyethoxy)ethanol                                               | Industrial solvent, paints, wood stains, textile inks, brake fluids      |
| $\text{C}_5\text{H}_8\text{O}_2$                  | Methyl methacrylate                         | Acetylpropionyl, 2-Methyltetrahydrofuran-3-one                          | Solvents for paints, inks and lacquers, coffee aroma                     |
| $\text{C}_3\text{H}_6\text{O}$                    | Acetone                                     | Propionaldehyde                                                         | Wide-use solvent, disinfectant                                           |
| $\text{C}_4\text{H}_6\text{O}$                    | Methyl vinyl ketone                         | Methacrolein, Crotonaldehyde                                            | Chemical precursor                                                       |
| $\text{C}_{11}\text{H}_{14}\text{O}_3$            | Butyl paraben                               |                                                                         | Antioxidant, cosmetic preservatives                                      |
| $\text{C}_5\text{H}_{10}\text{O}_2$               | Isopropyl acetate; n-Propyl acetate         | Isobutyl formate, Methyl isobutyrate                                    | Fragrances, industrial solvent                                           |

|                                                               |                                 |                                             |                                                                       |
|---------------------------------------------------------------|---------------------------------|---------------------------------------------|-----------------------------------------------------------------------|
| C <sub>7</sub> H <sub>6</sub> O                               | Benzaldehyde                    |                                             | Soaps, dyes, fragrances                                               |
| C <sub>8</sub> H <sub>8</sub> O <sub>3</sub>                  | Methyl paraben                  |                                             | Cosmetics, personal care products                                     |
| C <sub>10</sub> H <sub>20</sub> O                             | Menthol                         | Citronellal, Decanal, Rhodinol              | Fragrances, insect repellants, food flavoring                         |
| C <sub>4</sub> H <sub>10</sub> O <sub>3</sub>                 | Diethylene glycol               |                                             | Solvent for resins, dyes, oils                                        |
| C <sub>10</sub> H <sub>12</sub> O <sub>2</sub>                | Eugenol                         | Chavibetol, Propyl benzoate, Hinokitiol     | Fragrances, cosmetic preservatives, food flavoring, consumer products |
| C <sub>12</sub> H <sub>14</sub> O <sub>4</sub>                | Diethyl phthalate               |                                             | Plasticizer in consumer products                                      |
| C <sub>16</sub> H <sub>30</sub> O <sub>4</sub>                | TXIB                            |                                             | Inks, coatings, lacquers                                              |
| C <sub>9</sub> H <sub>20</sub> O <sub>3</sub>                 | Dipropylene glycol propyl ether |                                             | Industrial solvent, inks, coatings                                    |
| C <sub>2</sub> H <sub>3</sub> N                               | Acetonitrile                    |                                             | Industrial solvent, chemical precursor, combustion by-product         |
| C <sub>3</sub> H <sub>6</sub> O <sub>2</sub>                  | Methyl acetate; Propionic acid  | Hydroxyacetone, Ethyl formate               | Industrial solvent, naturally occurring                               |
| C <sub>8</sub> H <sub>14</sub> O <sub>2</sub>                 | Cyclohexyl acetate              |                                             | Flavoring agent, fragrances                                           |
| C <sub>9</sub> H <sub>10</sub> O <sub>2</sub>                 | Benzyl acetate                  | Ethyl benzoate, Acetanisole                 | Fragrances, food flavoring                                            |
| C <sub>12</sub> H <sub>16</sub> O <sub>3</sub>                | 2-Phenoxyethyl isobutyrate      |                                             |                                                                       |
| C <sub>4</sub> H <sub>8</sub> O <sub>2</sub>                  | Butyric acid; Ethyl acetate     | Methyl propionate, Acetoin                  | Industrial solvent, coatings, fragrances, food flavoring              |
| C <sub>8</sub> H <sub>8</sub> O <sub>2</sub>                  | Methyl benzoate                 | Phenylacetic acid                           | Fragrances                                                            |
| C <sub>10</sub> H <sub>16</sub>                               | Monoterpenes                    |                                             | Widely-used fragrances, Food flavoring, biogenic sources              |
| C <sub>7</sub> H <sub>6</sub> O <sub>2</sub>                  | Benzoic acid                    |                                             | Fragrances, dyes, insect repellents                                   |
| C <sub>8</sub> H <sub>16</sub> O <sub>2</sub>                 | Octanoic acid                   | Hexyl acetate                               | Disinfectants, skin products, industrial solvent                      |
| C <sub>8</sub> H <sub>24</sub> O <sub>4</sub> Si <sub>4</sub> | D4-siloxane                     |                                             | Adhesives, silicone rubbers, gels                                     |
| C <sub>9</sub> H <sub>18</sub> O <sub>2</sub>                 | Methyl octanoate                | Heptyl acetate, Pentyl butyrate             | Fragrances, cigarette additive                                        |
| C <sub>15</sub> H <sub>24</sub>                               | Sesquiterpenes                  |                                             | Fragrances, biogenic sources                                          |
| C <sub>2</sub> H <sub>6</sub> O <sub>2</sub>                  | Ethylene glycol                 | Methoxymethanol                             | Antifreeze, coolant, de-icing agent, paints, printing inks            |
| C <sub>4</sub> H <sub>6</sub> O <sub>2</sub>                  | Vinyl acetate; Methyl acrylate  | γ-Butyrolactone, Methacrylic acid, Diacetyl | Monomer, precursor/feedstock, nail primers, fragrances                |
| C <sub>3</sub> H <sub>8</sub> O <sub>3</sub>                  | Glycerol                        |                                             | Personal care products, foods                                         |

**Table S5.** List of ions calibrated with authentic standards (Table S2), probable contributing isomers, background subtracted geometric mean concentrations (with standard deviations), annual emissions in each inventory, and measured mean concentration ratios (with standard deviations over the measurement period and linear correlation coefficients) with acetone and other prominent combustion-related tracers.

| Compound<br>formula, i                                        | Probable compounds, i                                                   | Geo. mean<br>concentration, ppt,<br>i | Emissions,<br>kg yr <sup>-1</sup><br>VCPy,<br>FIVE-VCP | Ratios to tracer compounds (mol/mol) <sup>†</sup> |                                       |                                      |                                             |
|---------------------------------------------------------------|-------------------------------------------------------------------------|---------------------------------------|--------------------------------------------------------|---------------------------------------------------|---------------------------------------|--------------------------------------|---------------------------------------------|
|                                                               |                                                                         |                                       |                                                        | $\Delta i/\Delta \text{Benzene (r)}$              | $\Delta i^*1000/\Delta \text{CO (r)}$ | $\Delta i/\Delta \text{Acetone (r)}$ | $\Delta i/\Delta \text{Benzyl alcohol (r)}$ |
| C <sub>2</sub> H <sub>6</sub> O <sub>2</sub>                  | Ethylene glycol                                                         | 2437±3622                             | 361511, 260540                                         | 1.1E+01±2.5E+01<br>(0.79)                         | 9.1E+00±2.0E+01<br>(0.83)             | 2.8E+00±6.4E+00<br>(0.95)            | 3.0E+02±6.5E+02<br>(0.88)                   |
| C <sub>3</sub> H <sub>6</sub> O                               | Acetone*                                                                | 977±783                               | 1333642,<br>1647548                                    | 3.8E+00±6.7E+00<br>(0.83)                         | 3.3E+00±5.2E+00<br>(0.87)             | --                                   | 1.1E+02±1.6E+02<br>(0.92)                   |
| C <sub>4</sub> H <sub>6</sub> O <sub>2</sub>                  | Methyl acrylate*,<br>Diacetyl*                                          | 810±396                               | 1905, 4638                                             | 2.1E+00±3.6E+00<br>(0.82)                         | 1.8E+00±2.7E+00<br>(0.89)             | 5.6E-01±8.9E-01<br>(0.95)            | 5.9E+01±8.6E+01<br>(0.94)                   |
| C <sub>4</sub> H <sub>8</sub> O <sub>2</sub>                  | Ethyl acetate*, Butyric<br>acid                                         | 679±664                               | 27958, 323                                             | 2.8E+00±5.3E+00<br>(0.72)                         | 2.3E+00±4.1E+00<br>(0.73)             | 7.2E-01±1.3E+00<br>(0.73)            | 7.6E+01±1.3E+02<br>(0.67)                   |
| C <sub>3</sub> H <sub>6</sub> O <sub>2</sub>                  | Methyl acetate*,<br>Propionic acid,<br>Hydroxyacetone, Ethyl<br>formate | 435±377                               | 50747, 114453                                          | 1.7E+00±3.1E+00<br>(0.64)                         | 1.5E+00±2.4E+00<br>(0.65)             | 4.5E-01±7.9E-01<br>(0.76)            | 4.8E+01±7.7E+01<br>(0.7)                    |
| C <sub>2</sub> H <sub>3</sub> N                               | Acetonitrile                                                            | 246±102                               |                                                        | 8.5E-01±1.2E+00<br>(0.32)                         | 7.2E-01±9.1E-01<br>(0.24)             | 2.2E-01±3.0E-01<br>(0.35)            | 2.3E+01±2.8E+01<br>(0.33)                   |
| C <sub>10</sub> H <sub>16</sub>                               | Monoterpenes (e.g.,<br>limonene*, $\alpha$ -Pinene*)                    | 156±105                               | 60206, 17107                                           | 5.1E-01±9.0E-01<br>(0.79)                         | 4.3E-01±6.9E-01<br>(0.87)             | 1.3E-01±2.3E-01<br>(0.85)            | 1.4E+01±2.2E+01<br>(0.94)                   |
| C <sub>4</sub> H <sub>8</sub> O                               | MEK, THF, Cyclopropyl<br>carbinol*                                      | 126±82                                | 41369, 293752                                          | 4.3E-01±7.3E-01<br>(0.79)                         | 3.7E-01±5.6E-01<br>(0.84)             | 1.1E-01±1.8E-01<br>(0.93)            | 1.2E+01±1.8E+01<br>(0.85)                   |
| C <sub>5</sub> H <sub>10</sub> O <sub>2</sub>                 | Isopropyl acetate*, n-<br>propyl acetate*                               | 114±106                               | 2845, 5831                                             | 4.4E-01±8.3E-01<br>(0.61)                         | 3.7E-01±6.5E-01<br>(0.69)             | 1.1E-01±2.1E-01<br>(0.69)            | 1.2E+01±2.1E+01<br>(0.58)                   |
| C <sub>5</sub> H <sub>8</sub> O <sub>2</sub>                  | Methyl methacrylate*                                                    | 108±121                               | 1102, -                                                | 4.1E-01±8.8E-01<br>(0.45)                         | 3.5E-01±7.0E-01<br>(0.37)             | 1.1E-01±2.2E-01<br>(0.5)             | 1.1E+01±2.2E+01<br>(0.41)                   |
| C <sub>6</sub> H <sub>12</sub> O <sub>2</sub>                 | Butyl acetate*                                                          | 103±138                               | 74432, 62692                                           | 4.9E-01±1.0E+00<br>(0.76)                         | 4.1E-01±8.1E-01<br>(0.77)             | 1.3E-01±2.6E-01<br>(0.87)            | 1.3E+01±2.6E+01<br>(0.83)                   |
| C <sub>8</sub> H <sub>8</sub> O <sub>2</sub>                  | Methyl benzoate*                                                        | 92±15                                 |                                                        | 1.1E-01±1.6E-01<br>(0.72)                         | 9.1E-02±1.2E-01<br>(0.75)             | 2.8E-02±4.1E-02<br>(0.78)            | 3.0E+00±3.8E+00<br>(0.79)                   |
| C <sub>8</sub> H <sub>16</sub> O <sub>2</sub>                 | Caprylic acid* (i.e.,<br>Octanoic acid)                                 | 87±47                                 | 5281, -                                                | 2.5E-01±4.2E-01<br>(0.81)                         | 2.1E-01±3.2E-01<br>(0.92)             | 6.5E-02±1.1E-01<br>(0.92)            | 6.9E+00±1.0E+01<br>(0.95)                   |
| C <sub>3</sub> H <sub>8</sub> O <sub>2</sub>                  | 2-Methoxy ethanol,<br>propylene glycol*                                 | 82±51                                 | 240692, -                                              | 2.9E-01±4.7E-01<br>(0.71)                         | 2.4E-01±3.6E-01<br>(0.71)             | 7.5E-02±1.2E-01<br>(0.85)            | 7.9E+00±1.1E+01<br>(0.77)                   |
| C <sub>9</sub> H <sub>18</sub> O <sub>2</sub>                 | Methyl octanoate,<br>Nonanoic acid*                                     | 77±24                                 |                                                        | 1.4E-01±2.3E-01<br>(0.79)                         | 1.2E-01±1.7E-01<br>(0.9)              | 3.7E-02±5.7E-02<br>(0.9)             | 3.9E+00±5.4E+00<br>(0.94)                   |
| C <sub>7</sub> H <sub>6</sub> O                               | Benzaldehyde*                                                           | 76±37                                 | 142, 2                                                 | 2.1E-01±3.4E-01<br>(0.83)                         | 1.8E-01±2.6E-01<br>(0.88)             | 5.4E-02±8.6E-02<br>(0.88)            | 5.7E+00±8.2E+00<br>(0.93)                   |
| C <sub>15</sub> H <sub>24</sub>                               | Sesquiterpenes (e.g., $\beta$ -<br>Caryophyllene)                       | 70±11                                 |                                                        | 7.3E-02±1.2E-01<br>(0.73)                         | 6.2E-02±8.6E-02<br>(0.83)             | 1.9E-02±2.9E-02<br>(0.78)            | 2.0E+00±2.7E+00<br>(0.9)                    |
| C <sub>6</sub> H <sub>12</sub> O                              | 2-Hexanone*, 4-Methyl-<br>2-pentanone                                   | 59±42                                 | 6162, 16527                                            | 2.0E-01±3.6E-01<br>(0.83)                         | 1.7E-01±2.8E-01<br>(0.84)             | 5.3E-02±9.0E-02<br>(0.92)            | 5.6E+00±8.8E+00<br>(0.91)                   |
| C <sub>7</sub> H <sub>6</sub> O <sub>2</sub>                  | Benzoic acid*                                                           | 59±9                                  |                                                        | 5.8E-02±9.0E-02<br>(0.48)                         | 4.9E-02±6.7E-02<br>(0.39)             | 1.5E-02±2.2E-02<br>(0.4)             | 1.6E+00±2.1E+00<br>(0.45)                   |
| C <sub>4</sub> H <sub>6</sub> O                               | MVK, MACR                                                               | 58±39                                 |                                                        | 1.9E-01±3.3E-01<br>(0.83)                         | 1.6E-01±2.5E-01<br>(0.87)             | 4.9E-02±8.3E-02<br>(0.94)            | 5.1E+00±8.0E+00<br>(0.94)                   |
| C <sub>8</sub> H <sub>14</sub> O <sub>2</sub>                 | Cyclohexyl acetate                                                      | 43±20                                 |                                                        | 1.2E-01±2.0E-01<br>(0.81)                         | 1.0E-01±1.5E-01<br>(0.89)             | 3.2E-02±4.9E-02<br>(0.95)            | 3.4E+00±4.7E+00<br>(0.95)                   |
| C <sub>9</sub> H <sub>10</sub> O <sub>2</sub>                 | Benzyl acetate                                                          | 39±19                                 | 7, -                                                   | 1.0E-01±1.7E-01<br>(0.82)                         | 8.8E-02±1.3E-01<br>(0.89)             | 2.7E-02±4.4E-02<br>(0.87)            | 2.9E+00±4.2E+00<br>(0.95)                   |
| C <sub>6</sub> H <sub>14</sub> O <sub>3</sub>                 | Dipropylene glycol                                                      | 36±28                                 | 41085, 116574                                          | 1.4E-01±2.4E-01<br>(0.65)                         | 1.2E-01±1.9E-01<br>(0.71)             | 3.6E-02±6.1E-02<br>(0.7)             | 3.8E+00±5.9E+00<br>(0.8)                    |
| C <sub>4</sub> H <sub>10</sub> O <sub>3</sub>                 | Diethylene glycol                                                       | 32±17                                 | 7026, 122315                                           | 8.9E-02±1.5E-01<br>(0.84)                         | 7.5E-02±1.2E-01<br>(0.87)             | 2.3E-02±3.8E-02<br>(0.91)            | 2.4E+00±3.7E+00<br>(0.92)                   |
| C <sub>10</sub> H <sub>20</sub> O                             | Menthol, Decanal*                                                       | 31±18                                 | 971, 0.06                                              | 9.4E-02±1.6E-01<br>(0.77)                         | 7.9E-02±1.2E-01<br>(0.89)             | 2.4E-02±4.0E-02<br>(0.9)             | 2.6E+00±3.8E+00<br>(0.96)                   |
| C <sub>5</sub> H <sub>8</sub> O                               | Cyclopentanone                                                          | 30±16                                 |                                                        | 8.4E-02±1.4E-01<br>(0.84)                         | 7.1E-02±1.1E-01<br>(0.9)              | 2.2E-02±3.5E-02<br>(0.95)            | 2.3E+00±3.4E+00<br>(0.95)                   |
| C <sub>6</sub> H <sub>14</sub> O <sub>2</sub>                 | 2-Butoxyethanol*, 1-<br>propoxy-2-propanol*                             | 23±19                                 | 107758, 79520                                          | 8.9E-02±1.6E-01<br>(0.8)                          | 7.5E-02±1.2E-01<br>(0.87)             | 2.3E-02±3.9E-02<br>(0.91)            | 2.4E+00±3.8E+00<br>(0.9)                    |
| C <sub>8</sub> H <sub>24</sub> O <sub>4</sub> Si <sub>4</sub> | D4 siloxane*                                                            | 23±3                                  | 12872, 102213                                          | 2.3E-02±3.6E-02<br>(0.38)                         | 2.0E-02±2.7E-02<br>(0.48)             | 6.0E-03±8.9E-03<br>(0.48)            | 6.4E-01±8.5E-01<br>(0.59)                   |
| C <sub>16</sub> H <sub>30</sub> O <sub>4</sub>                | TXIB*                                                                   | 18±4                                  | - , 2496                                               | 2.6E-02±4.2E-02<br>(0.73)                         | 2.2E-02±3.2E-02<br>(0.83)             | 6.8E-03±1.1E-02<br>(0.75)            | 7.2E-01±1.0E+00<br>(0.86)                   |

|                                                                |                                                 |       |                 |                           |                           |                           |                           |
|----------------------------------------------------------------|-------------------------------------------------|-------|-----------------|---------------------------|---------------------------|---------------------------|---------------------------|
| C <sub>10</sub> H <sub>12</sub> O <sub>2</sub>                 | Eugenol                                         | 16±5  | 45, -           | 3.1E-02±4.9E-02<br>(0.82) | 2.6E-02±3.7E-02<br>(0.85) | 7.9E-03±1.2E-02<br>(0.91) | 8.4E-01±1.2E+00<br>(0.92) |
| C <sub>9</sub> H <sub>20</sub> O <sub>3</sub>                  | Dipropylene glycol<br>propyl ether              | 16±4  | 4150, 6578      | 2.3E-02±3.8E-02<br>(0.65) | 2.0E-02±2.9E-02<br>(0.71) | 6.1E-03±9.5E-03<br>(0.62) | 6.4E-01±9.1E-01<br>(0.73) |
| C <sub>12</sub> H <sub>16</sub> O <sub>3</sub>                 | 2-Phenoxyethyl<br>isobutyrate                   | 16±2  |                 | 1.6E-02±2.4E-02<br>(0.73) | 1.3E-02±1.8E-02<br>(0.76) | 4.1E-03±5.9E-03<br>(0.79) | 4.4E-01±5.6E-01<br>(0.83) |
| C <sub>10</sub> H <sub>30</sub> O <sub>5</sub> Si <sub>5</sub> | D5 siloxane*                                    | 16±15 | 272778, 357202  | 6.7E-02±1.2E-01<br>(0.7)  | 5.7E-02±9.6E-02<br>(0.82) | 1.7E-02±3.1E-02<br>(0.82) | 1.8E+00±3.0E+00<br>(0.9)  |
| C <sub>12</sub> H <sub>14</sub> O <sub>4</sub>                 | Diethyl phthalate                               | 15±3  | 22898, 22923    | 2.3E-02±3.4E-02<br>(0.64) | 1.9E-02±2.5E-02<br>(0.7)  | 5.9E-03±8.4E-03<br>(0.65) | 6.2E-01±7.8E-01<br>(0.71) |
| C <sub>7</sub> H <sub>8</sub> O                                | Benzyl alcohol                                  | 14±6  | 17138, -        | 3.6E-02±5.9E-02<br>(0.85) | 3.1E-02±4.5E-02<br>(0.92) | 9.5E-03±1.5E-02<br>(0.92) | --                        |
| C <sub>8</sub> H <sub>14</sub> O                               | 6-Methyl 5-hepten-2-one                         | 14±7  |                 | 4.1E-02±6.6E-02<br>(0.81) | 3.4E-02±5.0E-02<br>(0.89) | 1.1E-02±1.6E-02<br>(0.96) | 1.1E+00±1.6E+00<br>(0.96) |
| C <sub>8</sub> H <sub>8</sub> O <sub>3</sub>                   | Methyl paraben                                  | 14±4  |                 | 2.4E-02±3.9E-02<br>(0.83) | 2.1E-02±2.9E-02<br>(0.86) | 6.3E-03±9.7E-03<br>(0.83) | 6.7E-01±9.2E-01<br>(0.87) |
| C <sub>4</sub> H <sub>10</sub> O <sub>2</sub>                  | 1-Methoxy-2-propanol                            | 13±8  | 3405, 2405      | 4.1E-02±7.1E-02<br>(0.78) | 3.5E-02±5.4E-02<br>(0.85) | 1.1E-02±1.8E-02<br>(0.89) | 1.1E+00±1.7E+00<br>(0.89) |
| C <sub>5</sub> H <sub>4</sub> O <sub>2</sub>                   | Furfural*                                       | 13±6  | -, 0.01         | 3.4E-02±5.7E-02<br>(0.71) | 2.9E-02±4.3E-02<br>(0.62) | 8.8E-03±1.4E-02<br>(0.56) | 9.3E-01±1.4E+00<br>(0.66) |
| C <sub>6</sub> H <sub>10</sub> O                               | Cyclohexanone                                   | 12±6  | 10017, 8214     | 3.6E-02±5.9E-02<br>(0.84) | 3.0E-02±4.5E-02<br>(0.91) | 9.4E-03±1.5E-02<br>(0.96) | 9.9E-01±1.4E+00<br>(0.92) |
| C <sub>6</sub> H <sub>12</sub> O <sub>3</sub>                  | PGMEA, 2-Ethoxyethyl<br>acetate                 | 12±11 | 384, 106653     | 4.7E-02±8.8E-02<br>(0.78) | 4.0E-02±6.8E-02<br>(0.76) | 1.2E-02±2.2E-02<br>(0.9)  | 1.3E+00±2.2E+00<br>(0.86) |
| C <sub>6</sub> H <sub>6</sub> O <sub>3</sub>                   | Maltol                                          | 11±3  |                 | 1.3E-02±2.3E-02<br>(0.59) | 1.1E-02±1.7E-02<br>(0.44) | 3.4E-03±5.6E-03<br>(0.42) | 3.6E-01±5.4E-01<br>(0.49) |
| C <sub>8</sub> H <sub>8</sub> O                                | Acetophenone*                                   | 10±6  | 4, -            | 3.2E-02±5.5E-02<br>(0.81) | 2.7E-02±4.2E-02<br>(0.85) | 8.4E-03±1.4E-02<br>(0.89) | 8.8E-01±1.3E+00<br>(0.9)  |
| C <sub>5</sub> H <sub>9</sub> NO                               | Methyl pyrrolidone                              | 9±3   | 12749, 15452    | 1.9E-02±3.1E-02<br>(0.72) | 1.6E-02±2.3E-02<br>(0.78) | 5.0E-03±7.7E-03<br>(0.77) | 5.3E-01±7.4E-01<br>(0.78) |
| C <sub>8</sub> H <sub>10</sub> O <sub>2</sub>                  | Phenoxyethanol*                                 | 9±3   | 9851, 0.25      | 1.7E-02±2.9E-02<br>(0.78) | 1.5E-02±2.2E-02<br>(0.84) | 4.5E-03±7.2E-03<br>(0.86) | 4.8E-01±6.9E-01<br>(0.91) |
| C <sub>8</sub> H <sub>18</sub> O <sub>3</sub>                  | 2-(2-<br>Butoxyethoxy)ethanol,<br>DGBE          | 8±4   | 48389, 68370    | 2.1E-02±3.5E-02<br>(0.85) | 1.8E-02±2.7E-02<br>(0.91) | 5.4E-03±8.7E-03<br>(0.89) | 5.7E-01±8.4E-01<br>(0.94) |
| C <sub>10</sub> H <sub>10</sub> O <sub>4</sub>                 | Dimethyl phthalate                              | 7±1   | 70, -           | 9.1E-03±1.5E-02<br>(0.62) | 7.7E-03±1.1E-02<br>(0.62) | 2.4E-03±3.6E-03<br>(0.55) | 2.5E-01±3.4E-01<br>(0.65) |
| C <sub>12</sub> H <sub>24</sub> O <sub>3</sub>                 | Texanol*                                        | 7±4   | 267615, 197658  | 2.0E-02±3.5E-02<br>(0.57) | 1.7E-02±2.7E-02<br>(0.74) | 5.3E-03±8.7E-03<br>(0.67) | 5.6E-01±8.4E-01<br>(0.74) |
| C <sub>9</sub> H <sub>10</sub> O <sub>3</sub>                  | Ethyl paraben                                   | 6±1   |                 | 7.0E-03±1.1E-02<br>(0.84) | 5.9E-03±8.2E-03<br>(0.84) | 1.8E-03±2.7E-03<br>(0.85) | 1.9E-01±2.6E-01<br>(0.9)  |
| C <sub>11</sub> H <sub>14</sub> O <sub>3</sub>                 | Butyl paraben                                   | 6±1   |                 | 8.5E-03±1.3E-02<br>(0.71) | 7.2E-03±9.4E-03<br>(0.74) | 2.2E-03±3.1E-03<br>(0.8)  | 2.3E-01±2.9E-01<br>(0.76) |
| C <sub>6</sub> H <sub>10</sub> O <sub>3</sub>                  | Ethyl acetoacetate                              | 4±2   |                 | 1.3E-02±2.2E-02<br>(0.85) | 1.1E-02±1.6E-02<br>(0.87) | 3.4E-03±5.4E-03<br>(0.93) | 3.6E-01±5.2E-01<br>(0.91) |
| C <sub>10</sub> H <sub>12</sub> O                              | Benzyl acetone                                  | 4±2   |                 | 1.0E-02±1.7E-02<br>(0.85) | 8.5E-03±1.3E-02<br>(0.91) | 2.6E-03±4.2E-03<br>(0.94) | 2.8E-01±4.1E-01<br>(0.97) |
| C <sub>7</sub> H <sub>12</sub> O <sub>4</sub>                  | Pentadioic acid,<br>dimethyl ester              | 4±1   | 4942, 28232     | 7.2E-03±1.1E-02<br>(0.8)  | 6.1E-03±8.5E-03<br>(0.84) | 1.9E-03±2.8E-03<br>(0.87) | 2.0E-01±2.7E-01<br>(0.89) |
| C <sub>10</sub> H <sub>12</sub> O <sub>3</sub>                 | Propyl paraben                                  | 4±1   |                 | 6.3E-03±1.0E-02<br>(0.54) | 5.3E-03±7.7E-03<br>(0.46) | 1.6E-03±2.5E-03<br>(0.42) | 1.7E-01±2.4E-01<br>(0.51) |
| C <sub>10</sub> H <sub>20</sub> O <sub>2</sub>                 | Hydroxycitronellal                              | 3±1   |                 | 5.3E-03±8.4E-03<br>(0.78) | 4.5E-03±6.3E-03<br>(0.88) | 1.4E-03±2.1E-03<br>(0.92) | 1.5E-01±2.0E-01<br>(0.95) |
| C <sub>8</sub> H <sub>18</sub> O <sub>2</sub>                  | Ethylene glycol hexyl<br>ether*, 1,2-Octanediol | 2±1   | 15836, 8544     | 5.8E-03±9.6E-03<br>(0.8)  | 4.9E-03±7.3E-03<br>(0.88) | 1.5E-03±2.4E-03<br>(0.87) | 1.6E-01±2.3E-01<br>(0.94) |
| C <sub>3</sub> H <sub>8</sub> O <sub>3</sub>                   | Glycerol                                        | 1±0.5 | 148441, 1046753 | 3.0E-03±4.9E-03<br>(0.66) | 2.6E-03±3.7E-03<br>(0.69) | 7.9E-04±1.2E-03<br>(0.75) | 8.3E-02±1.2E-01<br>(0.74) |
| C <sub>6</sub> H <sub>14</sub> O <sub>4</sub>                  | Triethylene glycol                              | 1±0.3 | 1718, 1053      | 2.1E-03±3.4E-03<br>(0.47) | 1.8E-03±2.6E-03<br>(0.45) | 5.5E-04±8.4E-04<br>(0.4)  | 5.8E-02±8.0E-02<br>(0.51) |
